# Supplementary material for: Dietary Improvement during Lactation Normalizes miR-26a, miR-222 and miR-484 Levels in the Mammary Gland, but Not in Milk, of Diet-Induced Obese Rats
Source: MDPI journal article supplement (doi:10.3390/biomedicines10061292), 2022-05-31
Supplement: s1 [file s1]

**Table S1.** Nucleotide sequences of primers.

| Gene          | Forward Primer (5' to 3') | Reverse Primer (5' to 3') | Amplicon Size (pb) |
|---------------|---------------------------|---------------------------|--------------------|
| <i>Gdi</i>    | CCGCACAAGGCAAATACATC      | GACTCTCTGAACCGTCATCAA     | 210                |
| <i>Insig1</i> | ATCACCATCGCCTTCCTAGC      | TGTTTCCCCTGTGACACCT       | 142                |
| <i>Pten</i>   | CAGAAAAAGTGGAATGGAAG      | TGGAGAGAAGTATCGGTTGG      | 158                |
| <i>Rb1</i>    | CTCACGCTGCCCAGGAGACC      | GTAGGAGGCCTGGTGGAGGCA     | 139                |
| <i>Elovl6</i> | AGAACTGCTGCTGAGGGA        | GTCCACTAATCTCCTTGCCCA     | 95                 |
| <i>Stat3</i>  | GCTGACCAATAACCCCAAGA      | ACACCCTGAGTAGTTCACACCA    | 181                |
| <i>Cdkn1b</i> | CAGAATCATAAGCCCCTGGA      | GACGAGTCAGGCATTTGGTC      | 221                |
| <i>Cxcr4</i>  | GCCATGGCTGACTGGTACTT      | CACCCACATAGACGGCCTTT      | 187                |
| <i>Vegfa</i>  | TCGGAGAGCAACGTCCTATGCA    | GGCTCACAGTGAACGCTCCAGG    | 215                |

**Table S2.** List of putative target genes of miR-26a, miR-222 and miR-484 searched with TargetScan.

| Gene Symbol     | Gene Name                                                   | Target miRNA        |
|-----------------|-------------------------------------------------------------|---------------------|
| <i>A1CF</i>     | APOBEC1 complementation factor                              | miR-26a             |
| <i>AAK1</i>     | AP2 associated kinase 1                                     | miR-222             |
| <i>AAR2</i>     | AAR2 splicing factor homolog ( <i>S. cerevisiae</i> )       | mir-484             |
| <i>ABCA1</i>    | ATP-binding cassette, sub-family A (ABC1), member 1         | miR-26a             |
| <i>ABCC4</i>    | ATP-binding cassette, sub-family C (CFTR/MRP), member 4     | miR-26a             |
| <i>ABHD12</i>   | abhydrolase domain containing 12                            | mir-484             |
| <i>ABHD2</i>    | abhydrolase domain containing 2                             | miR-26a;<br>miR-484 |
| <i>ABHD5</i>    | abhydrolase domain containing 5                             | miR-26a             |
| <i>ABI2</i>     | abl-interactor 2                                            | miR-26a             |
| <i>ABL2</i>     | c-abl oncogene 2, non-receptor tyrosine kinase              | miR-26a             |
| <i>ACADSB</i>   | acyl-CoA dehydrogenase, short/branched chain                | miR-26a             |
| <i>ACBD5</i>    | acyl-CoA binding domain containing 5                        | miR-26a             |
| <i>ACSL3</i>    | acyl-CoA synthetase long-chain family member 3              | miR-26a             |
| <i>ACTR3</i>    | ARP3 actin-related protein 3 homolog (yeast)                | mir-484             |
| <i>ACVR1B</i>   | activin A receptor, type IB                                 | mir-484             |
| <i>ACVR1C</i>   | activin A receptor, type IC                                 | miR-26a;<br>miR-484 |
| <i>ACVR2B</i>   | activin A receptor, type IIB                                | miR-26a;<br>miR-222 |
| <i>ADAM10</i>   | ADAM metalloproteinase domain 10                            | miR-26a             |
| <i>ADAM11</i>   | ADAM metalloproteinase domain 11                            | miR-222             |
| <i>ADAM12</i>   | ADAM metalloproteinase domain 12                            | miR-26a             |
| <i>ADAM17</i>   | ADAM metalloproteinase domain 17                            | miR-26a             |
| <i>ADAM19</i>   | ADAM metalloproteinase domain 19                            | miR-26a             |
| <i>ADAM22</i>   | ADAM metalloproteinase domain 22                            | mir-484             |
| <i>ADAM23</i>   | ADAM metalloproteinase domain 23                            | miR-26a             |
| <i>ADAMTS19</i> | ADAM metalloproteinase with thrombospondin type 1 motif, 19 | miR-26a             |
| <i>ADAMTS5</i>  | ADAM metalloproteinase with thrombospondin type 1 motif, 5  | miR-26a             |

|                 |                                                                                                      |                     |
|-----------------|------------------------------------------------------------------------------------------------------|---------------------|
| <i>ADARB1</i>   | adenosine deaminase, RNA-specific, B1                                                                | mir-484             |
| <i>ADD2</i>     | adducin 2 (beta)                                                                                     | mir-484             |
| <i>ADM</i>      | adrenomedullin                                                                                       | miR-26a             |
| <i>ADNP</i>     | activity-dependent neuroprotector homeobox                                                           | mir-484             |
| <i>ADO</i>      | 2-aminoethanethiol (cysteamine) dioxygenase                                                          | mir-484             |
| <i>ADORA1</i>   | adenosine A1 receptor                                                                                | mir-484             |
| <i>AGAP2</i>    | ArfGAP with GTPase domain, ankyrin repeat and PH domain 2                                            | mir-484             |
| <i>AGFG1</i>    | ArfGAP with FG repeats 1                                                                             | miR-222             |
| <i>AGFG2</i>    | ArfGAP with FG repeats 2                                                                             | miR-222             |
| <i>AGL</i>      | amylo-alpha-1, 6-glucosidase, 4-alpha-glucanotransferase                                             | mir-484             |
| <i>AGPAT2</i>   | 1-acylglycerol-3-phosphate O-acyltransferase 2                                                       | mir-484             |
| <i>AGPAT3</i>   | 1-acylglycerol-3-phosphate O-acyltransferase 3                                                       | miR-26a             |
| <i>AGPS</i>     | alkylglycerone phosphate synthase                                                                    | miR-222             |
| <i>AJAP1</i>    | adherens junctions associated protein 1                                                              | miR-222             |
| <i>AK4</i>      | adenylate kinase 4                                                                                   | mir-484             |
| <i>AKIRIN1</i>  | akirin 1                                                                                             | miR-26a             |
| <i>ALDH5A1</i>  | aldehyde dehydrogenase 5 family, member A1                                                           | miR-26a             |
| <i>ALKBH5</i>   | alkB, alkylation repair homolog 5 (E. coli)                                                          | mir-484             |
| <i>ALKBH6</i>   | alkB, alkylation repair homolog 6 (E. coli)                                                          | mir-484             |
| <i>AMIGO1</i>   | adhesion molecule with Ig-like domain 1                                                              | miR-222             |
| <i>AMMECR1</i>  | Alport syndrome, mental retardation, midface hypoplasia and elliptocytosis chromosomal region gene 1 | miR-26a;<br>miR-222 |
| <i>AMOT</i>     | angiomotin                                                                                           | miR-26a             |
| <i>ANAPC16</i>  | anaphase promoting complex subunit 16                                                                | miR-222             |
| <i>ANGPTL2</i>  | angiopoietin-like 2                                                                                  | miR-222             |
| <i>ANK2</i>     | ankyrin 2, neuronal                                                                                  | miR-26a             |
| <i>ANKHD1</i>   | ankyrin repeat and KH domain containing 1                                                            | miR-222             |
| <i>ANKIB1</i>   | ankyrin repeat and IBR domain containing 1                                                           | miR-26a;<br>miR-222 |
| <i>ANKRD10</i>  | ankyrin repeat domain 10                                                                             | mir-484             |
| <i>ANKRD11</i>  | ankyrin repeat domain 11                                                                             | miR-26a             |
| <i>ANKRD13A</i> | ankyrin repeat domain 13A                                                                            | mir-484             |
| <i>ANKRD27</i>  | ankyrin repeat domain 27 (VPS9 domain)                                                               | mir-484             |
| <i>ANKRD52</i>  | ankyrin repeat domain 52                                                                             | miR-26a;<br>miR-222 |
| <i>ANKRD63</i>  | ankyrin repeat domain 63                                                                             | miR-26a             |
| <i>ANKRD9</i>   | ankyrin repeat domain 9                                                                              | mir-484             |
| <i>ANKS1A</i>   | ankyrin repeat and sterile alpha motif domain containing 1A                                          | miR-26a             |
| <i>ANKS1B</i>   | ankyrin repeat and sterile alpha motif domain containing 1B                                          | miR-26a             |
| <i>ANKS4B</i>   | ankyrin repeat and sterile alpha motif domain containing 4B                                          | mir-484             |
| <i>AP3M1</i>    | adaptor-related protein complex 3, mu 1 subunit                                                      | miR-222             |
| <i>AP4E1</i>    | adaptor-related protein complex 4, epsilon 1 subunit                                                 | mir-484             |
| <i>AP5M1</i>    | adaptor-related protein complex 5, mu 1 subunit                                                      | miR-26a             |

|                 |                                                                                      |                     |
|-----------------|--------------------------------------------------------------------------------------|---------------------|
| <i>APC</i>      | adenomatous polyposis coli                                                           | miR-26a             |
| <i>APEH</i>     | acylaminoacyl-peptide hydrolase                                                      | mir-484             |
| <i>APLNR</i>    | apelin receptor                                                                      | mir-484             |
| <i>APOOL</i>    | apolipoprotein O-like                                                                | miR-26a             |
| <i>APP</i>      | amyloid beta (A4) precursor protein                                                  | miR-26a             |
| <i>AR</i>       | androgen receptor                                                                    | mir-484             |
| <i>ARF4</i>     | ADP-ribosylation factor 4                                                            | miR-222             |
| <i>ARF6</i>     | ADP-ribosylation factor 6                                                            | miR-26a             |
| <i>ARFGEF1</i>  | ADP-ribosylation factor guanine nucleotide-exchange factor 1 (brefeldin A-inhibited) | miR-26a             |
| <i>ARHGAP19</i> | Rho GTPase activating protein 19                                                     | mir-484             |
| <i>ARHGAP21</i> | Rho GTPase activating protein 21                                                     | miR-26a             |
| <i>ARHGAP26</i> | Rho GTPase activating protein 26                                                     | miR-26a             |
| <i>ARHGAP42</i> | Rho GTPase activating protein 42                                                     | miR-222             |
| <i>ARHGDIA</i>  | Rho GDP dissociation inhibitor (GDI) alpha                                           | mir-484             |
| <i>ARHGEF10</i> | Rho guanine nucleotide exchange factor (GEF) 10                                      | miR-26a             |
| <i>ARHGEF12</i> | Rho guanine nucleotide exchange factor (GEF) 12                                      | miR-26a             |
| <i>ARHGEF25</i> | Rho guanine nucleotide exchange factor (GEF) 25                                      | mir-484             |
| <i>ARHGEF26</i> | Rho guanine nucleotide exchange factor (GEF) 26                                      | miR-26a             |
| <i>ARHGEF6</i>  | Rac/Cdc42 guanine nucleotide exchange factor (GEF) 6                                 | mir-484             |
| <i>ARID1A</i>   | AT rich interactive domain 1A (SWI-like)                                             | miR-222             |
| <i>ARID2</i>    | AT rich interactive domain 2 (ARID, RFX-like)                                        | miR-26a             |
| <i>ARID3A</i>   | AT rich interactive domain 3A (BRIGHT-like)                                          | miR-26a             |
| <i>ARID3B</i>   | AT rich interactive domain 3B (BRIGHT-like)                                          | miR-222             |
| <i>ARL4C</i>    | ADP-ribosylation factor-like 4C                                                      | miR-26a             |
| <i>ARL6IP6</i>  | ADP-ribosylation-like factor 6 interacting protein 6                                 | miR-26a             |
| <i>ARMCX2</i>   | armadillo repeat containing, X-linked 2                                              | miR-26a             |
| <i>ARNT</i>     | aryl hydrocarbon receptor nuclear translocator                                       | miR-222             |
| <i>ARNTL2</i>   | aryl hydrocarbon receptor nuclear translocator-like 2                                | mir-484             |
| <i>ARPC3</i>    | actin related protein 2/3 complex, subunit 3, 21kDa                                  | mir-484             |
| <i>ARRB1</i>    | arrestin, beta 1                                                                     | mir-484             |
| <i>ARSI</i>     | arylsulfatase family, member I                                                       | mir-484             |
| <i>ARTN</i>     | artemin                                                                              | mir-484             |
| <i>ASB1</i>     | ankyrin repeat and SOCS box containing 1                                             | mir-484             |
| <i>ASCL2</i>    | achaete-scute complex homolog 2 (Drosophila)                                         | miR-26a             |
| <i>ASPEN</i>    | asporin                                                                              | miR-26a             |
| <i>ATAD2B</i>   | ATPase family, AAA domain containing 2B                                              | miR-26a;<br>miR-222 |
| <i>ATF2</i>     | activating transcription factor 2                                                    | miR-26a;<br>miR-484 |
| <i>ATF5</i>     | activating transcription factor 5                                                    | mir-484             |
| <i>ATL3</i>     | atlastin GTPase 3                                                                    | miR-26a             |
| <i>ATP11C</i>   | ATPase, class VI, type 11C                                                           | miR-26a             |
| <i>ATP1A2</i>   | ATPase, Na <sup>+</sup> /K <sup>+</sup> transporting, alpha 2 polypeptide            | miR-26a             |
| <i>ATP1B1</i>   | ATPase, Na <sup>+</sup> /K <sup>+</sup> transporting, beta 1 polypeptide             | miR-222             |
| <i>ATP1B4</i>   | ATPase, Na <sup>+</sup> /K <sup>+</sup> transporting, beta 4 polypeptide             | miR-26a             |

|                |                                                                    |                     |
|----------------|--------------------------------------------------------------------|---------------------|
| <i>ATP2A3</i>  | ATPase, Ca <sup>++</sup> transporting, ubiquitous                  | mir-484             |
| <i>ATP6V1D</i> | ATPase, H <sup>+</sup> transporting, lysosomal 34kDa, V1 subunit D | mir-484             |
| <i>ATP7A</i>   | ATPase, Cu <sup>++</sup> transporting, alpha polypeptide           | mir-484             |
| <i>ATP8A2</i>  | ATPase, aminophospholipid transporter, class I, type 8A, member 2  | miR-222             |
| <i>ATPAF1</i>  | ATP synthase mitochondrial F1 complex assembly factor 1            | miR-26a             |
| <i>ATXN1</i>   | ataxin 1                                                           | miR-222             |
| <i>ATXN7</i>   | ataxin 7                                                           | miR-26a;<br>miR-222 |
| <i>ATXN7L1</i> | ataxin 7-like 1                                                    | mir-484             |
| <i>AXIN2</i>   | axin 2                                                             | miR-222             |
| <i>AZI2</i>    | 5-azacytidine induced 2                                            | miR-26a             |
| <i>B4GALT1</i> | UDP-Gal:betaGlcNAc beta 1,4- galactosyltransferase, polypeptide 1  | miR-26a             |
| <i>BABAM1</i>  | BRISC and BRCA1 A complex member 1                                 | mir-484             |
| <i>BAHD1</i>   | bromo adjacent homology domain containing 1                        | mir-484             |
| <i>BAK1</i>    | BCL2-antagonist/killer 1                                           | miR-26a             |
| <i>BARX2</i>   | BARX homeobox 2                                                    | mir-484             |
| <i>BAZ2A</i>   | bromodomain adjacent to zinc finger domain, 2A                     | mir-484             |
| <i>BAZ2B</i>   | bromodomain adjacent to zinc finger domain, 2B                     | miR-26a;<br>miR-222 |
| <i>BBC3</i>    | BCL2 binding component 3                                           | miR-222             |
| <i>BBX</i>     | bobby sox homolog (Drosophila)                                     | miR-26a             |
| <i>BCKDHB</i>  | branched chain keto acid dehydrogenase E1, beta polypeptide        | mir-484             |
| <i>BCL2</i>    | B-cell CLL/lymphoma 2                                              | mir-484             |
| <i>BCL2L1</i>  | BCL2-like 1                                                        | mir-484             |
| <i>BCL2L11</i> | BCL2-like 11 (apoptosis facilitator)                               | miR-222             |
| <i>BCL2L13</i> | BCL2-like 13 (apoptosis facilitator)                               | mir-484             |
| <i>BCL2L2</i>  | BCL2-like 2                                                        | mir-484             |
| <i>BCR</i>     | breakpoint cluster region                                          | miR-26a             |
| <i>BEND4</i>   | BEN domain containing 4                                            | miR-222;<br>miR-484 |
| <i>BFAR</i>    | bifunctional apoptosis regulator                                   | miR-26a             |
| <i>BHLHE22</i> | basic helix-loop-helix family, member e22                          | miR-26a             |
| <i>BHLHE40</i> | basic helix-loop-helix family, member e40                          | miR-26a             |
| <i>BHLHE41</i> | basic helix-loop-helix family, member e41                          | miR-26a             |
| <i>BICD2</i>   | bicaudal D homolog 2 (Drosophila)                                  | miR-26a             |
| <i>BLOC1S2</i> | biogenesis of lysosomal organelles complex-1, subunit 2            | miR-26a             |
| <i>BMF</i>     | Bcl2 modifying factor                                              | miR-222             |
| <i>BMP2K</i>   | BMP2 inducible kinase                                              | miR-26a             |
| <i>BMP8A</i>   | bone morphogenetic protein 8a                                      | mir-484             |
| <i>BOD1</i>    | biorientation of chromosomes in cell division 1                    | miR-26a             |
| <i>BRAP</i>    | BRCA1 associated protein                                           | miR-26a             |
| <i>BRD4</i>    | bromodomain containing 4                                           | mir-484             |

|                  |                                                                                     |                     |
|------------------|-------------------------------------------------------------------------------------|---------------------|
| <i>BRWD1</i>     | bromodomain and WD repeat domain containing 1                                       | miR-26a;<br>miR-222 |
| <i>BRWD3</i>     | bromodomain and WD repeat domain containing 3                                       | miR-26a;<br>miR-222 |
| <i>BTBD3</i>     | BTB (POZ) domain containing 3                                                       | mir-484             |
| <i>BTBD7</i>     | BTB (POZ) domain containing 7                                                       | miR-26a             |
| <i>BTG1</i>      | B-cell translocation gene 1, anti-proliferative                                     | miR-26a             |
| <i>BTG2</i>      | BTG family, member 2                                                                | miR-222             |
| <i>BTG4</i>      | B-cell translocation gene 4                                                         | mir-484             |
| <i>BYSL</i>      | bystin-like                                                                         | miR-222             |
| <i>BZRAP1</i>    | benzodiazapine receptor (peripheral) associated protein 1                           | mir-484             |
| <i>BZW1</i>      | basic leucine zipper and W2 domains 1                                               | miR-222             |
| <i>C10orf12</i>  | chromosome 10 open reading frame 12                                                 | miR-26a             |
| <i>C10orf137</i> | chromosome 10 open reading frame 137                                                | miR-26a             |
| <i>C11orf30</i>  | chromosome 11 open reading frame 30                                                 | mir-484             |
| <i>C11orf87</i>  | chromosome 11 open reading frame 87                                                 | miR-222             |
| <i>C14orf105</i> | chromosome 14 open reading frame 105                                                | mir-484             |
| <i>C15orf27</i>  | chromosome 15 open reading frame 27                                                 | mir-484             |
| <i>C15orf32</i>  | chromosome 15 open reading frame 32                                                 | mir-484             |
| <i>C15orf61</i>  | chromosome 15 open reading frame 61                                                 | miR-26a             |
| <i>C15orf62</i>  | chromosome 15 open reading frame 62                                                 | mir-484             |
| <i>C16orf52</i>  | chromosome 16 open reading frame 52                                                 | miR-222             |
| <i>C16orf58</i>  | chromosome 16 open reading frame 58                                                 | mir-484             |
| <i>C16orf70</i>  | chromosome 16 open reading frame 70                                                 | miR-26a             |
| <i>C16orf92</i>  | chromosome 16 open reading frame 92                                                 | miR-222             |
| <i>C17orf59</i>  | chromosome 17 open reading frame 59                                                 | mir-484             |
| <i>C17orf78</i>  | chromosome 17 open reading frame 78                                                 | mir-484             |
| <i>C17orf80</i>  | chromosome 17 open reading frame 80                                                 | mir-484             |
| <i>C18orf25</i>  | chromosome 18 open reading frame 25                                                 | miR-26a;<br>miR-222 |
| <i>C19orf26</i>  | chromosome 19 open reading frame 26                                                 | mir-484             |
| <i>C1GALT1</i>   | core 1 synthase, glycoprotein-N-acetylgalactosamine 3-beta-galactosyltransferase, 1 | miR-26a             |
| <i>C1orf116</i>  | chromosome 1 open reading frame 116                                                 | mir-484             |
| <i>C1orf220</i>  | chromosome 1 open reading frame 220                                                 | mir-484             |
| <i>C1orf95</i>   | chromosome 1 open reading frame 95                                                  | mir-484             |
| <i>C1RL</i>      | complement component 1, r subcomponent-like                                         | mir-484             |
| <i>C20orf196</i> | chromosome 20 open reading frame 196                                                | mir-484             |
| <i>C20orf24</i>  | chromosome 20 open reading frame 24                                                 | miR-26a             |
| <i>C2CD2L</i>    | C2CD2-like                                                                          | miR-26a             |
| <i>C2CD5</i>     | C2 calcium-dependent domain containing 5                                            | miR-26a             |
| <i>C2orf88</i>   | chromosome 2 open reading frame 88                                                  | mir-484             |
| <i>C3orf62</i>   | chromosome 3 open reading frame 62                                                  | mir-484             |
| <i>C3orf70</i>   | chromosome 3 open reading frame 70                                                  | miR-222             |
| <i>C5orf63</i>   | chromosome 5 open reading frame 63                                                  | mir-484             |
| <i>C7orf41</i>   | chromosome 7 open reading frame 41                                                  | mir-484             |

|                 |                                                              |                     |
|-----------------|--------------------------------------------------------------|---------------------|
| <i>C8orf46</i>  | chromosome 8 open reading frame 46                           | mir-484             |
| <i>C9orf129</i> | chromosome 9 open reading frame 129                          | mir-484             |
| <i>C9orf139</i> | chromosome 9 open reading frame 139                          | mir-484             |
| <i>C9orf47</i>  | chromosome 9 open reading frame 47                           | mir-484             |
| <i>C9orf64</i>  | chromosome 9 open reading frame 64                           | mir-484             |
| <i>CABP7</i>    | calcium binding protein 7                                    | miR-222;<br>miR-484 |
| <i>CACFD1</i>   | calcium channel flower domain containing 1                   | mir-484             |
| <i>CACNA1C</i>  | calcium channel, voltage-dependent, L type, alpha 1C subunit | miR-26a             |
| <i>CACNA1E</i>  | calcium channel, voltage-dependent, R type, alpha 1E subunit | mir-484             |
| <i>CACNA1H</i>  | calcium channel, voltage-dependent, T type, alpha 1H subunit | mir-484             |
| <i>CACNA1I</i>  | calcium channel, voltage-dependent, T type, alpha 1I subunit | mir-484             |
| <i>CACNB4</i>   | calcium channel, voltage-dependent, beta 4 subunit           | miR-26a;<br>miR-222 |
| <i>CAMK2A</i>   | calcium/calmodulin-dependent protein kinase II alpha         | miR-26a             |
| <i>CAMKK1</i>   | calcium/calmodulin-dependent protein kinase kinase 1, alpha  | miR-222             |
| <i>CAMKK2</i>   | calcium/calmodulin-dependent protein kinase kinase 2, beta   | miR-26a             |
| <i>CAMSAP1</i>  | calmodulin regulated spectrin-associated protein 1           | miR-26a             |
| <i>CANX</i>     | calnexin                                                     | miR-222             |
| <i>CAPN7</i>    | calpain 7                                                    | mir-484             |
| <i>CAPRN2</i>   | caprin family member 2                                       | miR-222             |
| <i>CAPZA1</i>   | capping protein (actin filament) muscle Z-line, alpha 1      | miR-26a             |
| <i>CAPZB</i>    | capping protein (actin filament) muscle Z-line, beta         | miR-26a             |
| <i>CARM1</i>    | coactivator-associated arginine methyltransferase 1          | miR-26a             |
| <i>CASZ1</i>    | castor zinc finger 1                                         | miR-26a;<br>miR-222 |
| <i>CATSPER2</i> | cation channel, sperm associated 2                           | mir-484             |
| <i>CBFB</i>     | core-binding factor, beta subunit                            | miR-222             |
| <i>CBL</i>      | Cbl proto-oncogene, E3 ubiquitin protein ligase              | miR-222             |
| <i>CBS</i>      | cystathionine-beta-synthase                                  | mir-484             |
| <i>CBX5</i>     | chromobox homolog 5                                          | mir-484             |
| <i>CBX8</i>     | chromobox homolog 8                                          | mir-484             |
| <i>CC2D1B</i>   | coiled-coil and C2 domain containing 1B                      | miR-222             |
| <i>CCAR2</i>    | cell cycle and apoptosis regulator 2                         | miR-26a             |
| <i>CCDC102A</i> | coiled-coil domain containing 102A                           | mir-484             |
| <i>CCDC103</i>  | coiled-coil domain containing 103                            | mir-484             |
| <i>CCDC117</i>  | coiled-coil domain containing 117                            | mir-484             |
| <i>CCDC171</i>  | coiled-coil domain containing 171                            | miR-26a;<br>miR-222 |
| <i>CCDC28A</i>  | coiled-coil domain containing 28A                            | miR-26a             |
| <i>CCDC36</i>   | coiled-coil domain containing 36                             | mir-484             |
| <i>CCDC37</i>   | coiled-coil domain containing 37                             | mir-484             |

|                 |                                                      |                     |
|-----------------|------------------------------------------------------|---------------------|
| <i>CCDC42</i>   | coiled-coil domain containing 42                     | mir-484             |
| <i>CCDC50</i>   | coiled-coil domain containing 50                     | miR-222             |
| <i>CCDC6</i>    | coiled-coil domain containing 6                      | miR-26a             |
| <i>CCDC64</i>   | coiled-coil domain containing 64                     | miR-222             |
| <i>CCND2</i>    | cyclin D2                                            | miR-26a             |
| <i>CCNJ</i>     | cyclin J                                             | miR-26a             |
| <i>CCNJL</i>    | cyclin J-like                                        | miR-26a             |
| <i>CCPG1</i>    | cell cycle progression 1                             | mir-484             |
| <i>CCSER2</i>   | coiled-coil serine-rich protein 2                    | miR-26a             |
| <i>CD200</i>    | CD200 molecule                                       | miR-26a             |
| <i>CD2AP</i>    | CD2-associated protein                               | miR-222             |
| <i>CD4</i>      | CD4 molecule                                         | miR-222;<br>miR-484 |
| <i>CD72</i>     | CD72 molecule                                        | mir-484             |
| <i>CD93</i>     | CD93 molecule                                        | mir-484             |
| <i>CDC37L1</i>  | cell division cycle 37-like 1                        | mir-484             |
| <i>CDC42BPB</i> | CDC42 binding protein kinase beta (DMPK-like)        | mir-484             |
| <i>CDC42BPG</i> | CDC42 binding protein kinase gamma (DMPK-like)       | mir-484             |
| <i>CDC7</i>     | cell division cycle 7                                | mir-484             |
| <i>CDC73</i>    | cell division cycle 73                               | miR-26a             |
| <i>CDCP1</i>    | CUB domain containing protein 1                      | mir-484             |
| <i>CDH11</i>    | cadherin 11, type 2, OB-cadherin (osteoblast)        | miR-26a             |
| <i>CDH19</i>    | cadherin 19, type 2                                  | mir-484             |
| <i>CDH2</i>     | cadherin 2, type 1, N-cadherin (neuronal)            | miR-26a;<br>miR-222 |
| <i>CDH20</i>    | cadherin 20, type 2                                  | miR-26a             |
| <i>CDH4</i>     | cadherin 4, type 1, R-cadherin (retinal)             | miR-26a;<br>miR-222 |
| <i>CDH6</i>     | cadherin 6, type 2, K-cadherin (fetal kidney)        | mir-484             |
| <i>CDHR3</i>    | cadherin-related family member 3                     | mir-484             |
| <i>CDIP1</i>    | cell death-inducing p53 target 1                     | mir-484             |
| <i>CDK12</i>    | cyclin-dependent kinase 12                           | mir-484             |
| <i>CDK13</i>    | cyclin-dependent kinase 13                           | miR-26a             |
| <i>CDK2AP1</i>  | cyclin-dependent kinase 2 associated protein 1       | miR-26a             |
| <i>CDK6</i>     | cyclin-dependent kinase 6                            | miR-26a             |
| <i>CDK8</i>     | cyclin-dependent kinase 8                            | miR-26a;<br>miR-222 |
| <i>CDKL2</i>    | cyclin-dependent kinase-like 2 (CDC2-related kinase) | mir-484             |
| <i>CDKN1B</i>   | cyclin-dependent kinase inhibitor 1B (p27, Kip1)     | miR-222             |
| <i>CDKN1C</i>   | cyclin-dependent kinase inhibitor 1C (p57, Kip2)     | miR-222             |
| <i>CDR1</i>     | cerebellar degeneration-related protein 1, 34kDa     | mir-484             |
| <i>CDR2L</i>    | cerebellar degeneration-related protein 2-like       | miR-26a             |
| <i>CEBPG</i>    | CCAAT/enhancer binding protein (C/EBP), gamma        | miR-26a             |
| <i>CELF1</i>    | CUGBP, Elav-like family member 1                     | miR-26a             |
| <i>CELF2</i>    | CUGBP, Elav-like family member 2                     | miR-26a             |
| <i>CELSR1</i>   | cadherin, EGF LAG seven-pass G-type receptor 1       | miR-26a             |
| <i>CEND1</i>    | cell cycle exit and neuronal differentiation 1       | mir-484             |

|                |                                                                               |                     |
|----------------|-------------------------------------------------------------------------------|---------------------|
| <i>CENPB</i>   | centromere protein B, 80kDa                                                   | mir-484             |
| <i>CEP350</i>  | centrosomal protein 350kDa                                                    | miR-26a             |
| <i>CEP85</i>   | centrosomal protein 85kDa                                                     | mir-484             |
| <i>CFL1</i>    | cofilin 1 (non-muscle)                                                        | mir-484             |
| <i>CHAC1</i>   | ChaC, cation transport regulator homolog 1 (E. coli)                          | miR-26a             |
| <i>CHD1</i>    | chromodomain helicase DNA binding protein 1                                   | miR-26a             |
| <i>CHD2</i>    | chromodomain helicase DNA binding protein 2                                   | miR-222;<br>miR-484 |
| <i>CHD3</i>    | chromodomain helicase DNA binding protein 3                                   | mir-484             |
| <i>CHD7</i>    | chromodomain helicase DNA binding protein 7                                   | miR-222             |
| <i>CHD8</i>    | chromodomain helicase DNA binding protein 8                                   | miR-222             |
| <i>CHFR</i>    | checkpoint with forkhead and ring finger domains, E3 ubiquitin protein ligase | miR-26a             |
| <i>CHIC1</i>   | cysteine-rich hydrophobic domain 1                                            | miR-26a             |
| <i>CHORDC1</i> | cysteine and histidine-rich domain (CHORD) containing 1                       | miR-26a             |
| <i>CHRN</i>    | cholinergic receptor, nicotinic, delta (muscle)                               | mir-484             |
| <i>CHST2</i>   | carbohydrate (N-acetylglucosamine-6-O) sulfotransferase 2                     | miR-26a             |
| <i>CHSY1</i>   | chondroitin sulfate synthase 1                                                | miR-26a;<br>miR-222 |
| <i>CIB2</i>    | calcium and integrin binding family member 2                                  | mir-484             |
| <i>CISD3</i>   | CDGSH iron sulfur domain 3                                                    | miR-26a             |
| <i>CKS2</i>    | CDC28 protein kinase regulatory subunit 2                                     | miR-26a             |
| <i>CLASP2</i>  | cytoplasmic linker associated protein 2                                       | miR-26a             |
| <i>CLCN5</i>   | chloride channel, voltage-sensitive 5                                         | mir-484             |
| <i>CLDN20</i>  | claudin 20                                                                    | mir-484             |
| <i>CLEC4F</i>  | C-type lectin domain family 4, member F                                       | mir-484             |
| <i>CLOCK</i>   | clock circadian regulator                                                     | mir-484             |
| <i>CLRN1</i>   | clarin 1                                                                      | mir-484             |
| <i>CLVS2</i>   | clavesin 2                                                                    | miR-222;<br>miR-484 |
| <i>CLYBL</i>   | citrate lyase beta like                                                       | mir-484             |
| <i>CMPK2</i>   | cytidine monophosphate (UMP-CMP) kinase 2, mitochondrial                      | mir-484             |
| <i>CMTM4</i>   | CKLF-like MARVEL transmembrane domain containing 4                            | miR-26a;<br>miR-222 |
| <i>CMTM6</i>   | CKLF-like MARVEL transmembrane domain containing 6                            | mir-484             |
| <i>CMTR2</i>   | cap methyltransferase 2                                                       | mir-484             |
| <i>CNIH1</i>   | cornichon family AMPA receptor auxiliary protein 1                            | miR-26a             |
| <i>CNKSR2</i>  | connector enhancer of kinase suppressor of Ras 2                              | mir-484             |
| <i>CNNM2</i>   | cyclin M2                                                                     | miR-26a             |
| <i>CNOT2</i>   | CCR4-NOT transcription complex, subunit 2                                     | miR-222             |
| <i>CNPY1</i>   | canopy FGF signaling regulator 1                                              | mir-484             |
| <i>CNR1</i>    | cannabinoid receptor 1 (brain)                                                | mir-484             |
| <i>CNTFR</i>   | ciliary neurotrophic factor receptor                                          | mir-484             |
| <i>COL10A1</i> | collagen, type X, alpha 1                                                     | miR-26a             |



|                  |                                                                                        |                     |
|------------------|----------------------------------------------------------------------------------------|---------------------|
| <i>COL11A1</i>   | collagen, type XI, alpha 1                                                             | miR-26a             |
| <i>COL19A1</i>   | collagen, type XIX, alpha 1                                                            | miR-26a             |
| <i>COL1A2</i>    | collagen, type I, alpha 2                                                              | miR-26a             |
| <i>COL22A1</i>   | collagen, type XXII, alpha 1                                                           | miR-26a             |
| <i>COL5A1</i>    | collagen, type V, alpha 1                                                              | miR-26a             |
| <i>COPS2</i>     | COP9 signalosome subunit 2                                                             | miR-26a             |
| <i>COPS7B</i>    | COP9 signalosome subunit 7B                                                            | miR-26a             |
| <i>COX5A</i>     | cytochrome c oxidase subunit Va                                                        | miR-26a             |
| <i>CPEB2</i>     | cytoplasmic polyadenylation element binding protein 2                                  | miR-26a             |
| <i>CPEB3</i>     | cytoplasmic polyadenylation element binding protein 3                                  | miR-26a;<br>miR-222 |
| <i>CPEB4</i>     | cytoplasmic polyadenylation element binding protein 4                                  | miR-26a             |
| <i>CPED1</i>     | cadherin-like and PC-esterase domain containing 1                                      | miR-26a             |
| <i>CPNE8</i>     | copine VIII                                                                            | miR-222             |
| <i>CPPED1</i>    | calcineurin-like phosphoesterase domain containing 1                                   | miR-222             |
| <i>CPSF2</i>     | cleavage and polyadenylation specific factor 2, 100kDa                                 | miR-26a             |
| <i>CREB1</i>     | cAMP responsive element binding protein 1                                              | miR-26a             |
| <i>CREBBP</i>    | CREB binding protein                                                                   | miR-26a             |
| <i>CREBRF</i>    | CREB3 regulatory factor                                                                | miR-26a             |
| <i>CREBZF</i>    | CREB/ATF bZIP transcription factor                                                     | miR-26a;<br>miR-222 |
| <i>CRK</i>       | v-crk avian sarcoma virus CT10 oncogene homolog                                        | miR-222             |
| <i>CRLF3</i>     | cytokine receptor-like factor 3                                                        | miR-26a             |
| <i>CRTC2</i>     | CREB regulated transcription coactivator 2                                             | mir-484             |
| <i>CRTC3</i>     | CREB regulated transcription coactivator 3                                             | mir-484             |
| <i>CSF1R</i>     | colony stimulating factor 1 receptor                                                   | mir-484             |
| <i>CSNK1G1</i>   | casein kinase 1, gamma 1                                                               | miR-26a             |
| <i>CSRNP3</i>    | cysteine-serine-rich nuclear protein 3                                                 | mir-484             |
| <i>CT62</i>      | cancer/testis antigen 62                                                               | mir-484             |
| <i>CTCF</i>      | CCCTC-binding factor (zinc finger protein)                                             | miR-222             |
| <i>CTDSP2</i>    | CTD (carboxy-terminal domain, RNA polymerase II, polypeptide A) small phosphatase 2    | miR-26a             |
| <i>CTDSPL</i>    | CTD (carboxy-terminal domain, RNA polymerase II, polypeptide A) small phosphatase-like | mir-484             |
| <i>CTGF</i>      | connective tissue growth factor                                                        | miR-26a             |
| <i>CTIF</i>      | CBP80/20-dependent translation initiation factor                                       | miR-222             |
| <i>CTNNBIP1</i>  | catenin, beta interacting protein 1                                                    | miR-26a             |
| <i>CTNND2</i>    | catenin (cadherin-associated protein), delta 2                                         | miR-26a             |
| <i>CTTN</i>      | cortactin                                                                              | miR-222             |
| <i>CTTNBP2NL</i> | CTTNBP2 N-terminal like                                                                | miR-26a             |
| <i>CXCR3</i>     | chemokine (C-X-C motif) receptor 3                                                     | mir-484             |
| <i>CXCR5</i>     | chemokine (C-X-C motif) receptor 5                                                     | miR-222             |
| <i>CXorf23</i>   | chromosome X open reading frame 23                                                     | miR-26a             |
| <i>CYB5RL</i>    | cytochrome b5 reductase-like                                                           | mir-484             |

|                |                                                                |                     |
|----------------|----------------------------------------------------------------|---------------------|
| <i>CYP2A6</i>  | cytochrome P450, family 2, subfamily A, polypeptide 6          | mir-484             |
| <i>CYP2A7</i>  | cytochrome P450, family 2, subfamily A, polypeptide 7          | mir-484             |
| <i>CYP2W1</i>  | cytochrome P450, family 2, subfamily W, polypeptide 1          | mir-484             |
| <i>CYR61</i>   | cysteine-rich, angiogenic inducer, 61                          | miR-222             |
| <i>DAB2</i>    | Dab, mitogen-responsive phosphoprotein, homolog 2 (Drosophila) | miR-26a             |
| <i>DAPK1</i>   | death-associated protein kinase 1                              | miR-26a             |
| <i>DBNDD2</i>  | dysbindin (dystrobrevin binding protein 1) domain containing 2 | mir-484             |
| <i>DBNL</i>    | drebrin-like                                                   | miR-222             |
| <i>DCAF11</i>  | DDB1 and CUL4 associated factor 11                             | mir-484             |
| <i>DCAF7</i>   | DDB1 and CUL4 associated factor 7                              | miR-26a;<br>miR-222 |
| <i>DCBLD1</i>  | discoidin, CUB and LCCL domain containing 1                    | miR-26a             |
| <i>DCBLD2</i>  | discoidin, CUB and LCCL domain containing 2                    | miR-26a             |
| <i>DCDC2</i>   | doublecortin domain containing 2                               | miR-26a             |
| <i>DCP1A</i>   | decapping mRNA 1A                                              | mir-484             |
| <i>DCUN1D1</i> | DCN1, defective in cullin neddylation 1, domain containing 1   | miR-222             |
| <i>DCUN1D4</i> | DCN1, defective in cullin neddylation 1, domain containing 4   | miR-222             |
| <i>DCUN1D5</i> | DCN1, defective in cullin neddylation 1, domain containing 5   | miR-26a             |
| <i>DDIT4</i>   | DNA-damage-inducible transcript 4                              | miR-222             |
| <i>DDR1</i>    | discoidin domain receptor tyrosine kinase 1                    | mir-484             |
| <i>DDR2</i>    | discoidin domain receptor tyrosine kinase 2                    | miR-26a             |
| <i>DDT</i>     | D-dopachrome tautomerase                                       | mir-484             |
| <i>DDX17</i>   | DEAD (Asp-Glu-Ala-Asp) box helicase 17                         | miR-26a             |
| <i>DDX3X</i>   | DEAD (Asp-Glu-Ala-Asp) box helicase 3, X-linked                | miR-26a             |
| <i>DDX3Y</i>   | DEAD (Asp-Glu-Ala-Asp) box helicase 3, Y-linked                | miR-26a             |
| <i>DDX54</i>   | DEAD (Asp-Glu-Ala-Asp) box polypeptide 54                      | mir-484             |
| <i>DENND2C</i> | DENN/MADD domain containing 2C                                 | mir-484             |
| <i>DENND5A</i> | DENN/MADD domain containing 5A                                 | mir-484             |
| <i>DEPDC1B</i> | DEP domain containing 1B                                       | miR-26a             |
| <i>DERL2</i>   | derlin 2                                                       | miR-26a             |
| <i>DGCR14</i>  | DiGeorge syndrome critical region gene 14                      | miR-26a;<br>miR-484 |
| <i>DGCR2</i>   | DiGeorge syndrome critical region gene 2                       | mir-484             |
| <i>DGCR8</i>   | DGCR8 microprocessor complex subunit                           | mir-484             |
| <i>DGKD</i>    | diacylglycerol kinase, delta 130kDa                            | mir-484             |
| <i>DGKG</i>    | diacylglycerol kinase, gamma 90kDa                             | mir-484             |
| <i>DGKH</i>    | diacylglycerol kinase, eta                                     | miR-26a;<br>miR-222 |
| <i>DGKZ</i>    | diacylglycerol kinase, zeta                                    | mir-484             |
| <i>DHX36</i>   | DEAH (Asp-Glu-Ala-His) box polypeptide 36                      | miR-222             |

|                 |                                                                   |                     |
|-----------------|-------------------------------------------------------------------|---------------------|
| <i>DHX57</i>    | DEAH (Asp-Glu-Ala-Asp/His) box polypeptide 57                     | mir-484             |
| <i>DIDO1</i>    | death inducer-obliterator 1                                       | miR-26a             |
| <i>DIEXF</i>    | digestive organ expansion factor homolog (zebrafish)              | mir-484             |
| <i>DIO3</i>     | deiodinase, iodothyronine, type III                               | mir-484             |
| <i>DIRAS1</i>   | DIRAS family, GTP-binding RAS-like 1                              | mir-484             |
| <i>DKK2</i>     | dickkopf WNT signaling pathway inhibitor 2                        | miR-222             |
| <i>DLEC1</i>    | deleted in lung and esophageal cancer 1                           | mir-484             |
| <i>DLG2</i>     | discs, large homolog 2 (Drosophila)                               | miR-222             |
| <i>DLG4</i>     | discs, large homolog 4 (Drosophila)                               | miR-26a             |
| <i>DLG5</i>     | discs, large homolog 5 (Drosophila)                               | miR-26a             |
| <i>DMD</i>      | dystrophin                                                        | miR-26a             |
| <i>DMRT3</i>    | doublesex and mab-3 related transcription factor 3                | miR-26a;<br>miR-222 |
| <i>DMXL1</i>    | Dmx-like 1                                                        | miR-26a             |
| <i>DNAH10OS</i> | dynein, axonemal, heavy chain 10 opposite strand                  | miR-26a             |
| <i>DNAJA2</i>   | DnaJ (Hsp40) homolog, subfamily A, member 2                       | miR-26a             |
| <i>DNAJC14</i>  | DnaJ (Hsp40) homolog, subfamily C, member 14                      | miR-222             |
| <i>DNAJC21</i>  | DnaJ (Hsp40) homolog, subfamily C, member 21                      | miR-26a             |
| <i>DNAJC24</i>  | DnaJ (Hsp40) homolog, subfamily C, member 24                      | mir-484             |
| <i>DNAL1</i>    | dynein, axonemal, light chain 1                                   | miR-222             |
| <i>DND1</i>     | DND microRNA-mediated repression inhibitor 1                      | mir-484             |
| <i>DNM1L</i>    | dynamin 1-like                                                    | miR-26a;<br>miR-484 |
| <i>DNMT3A</i>   | DNA (cytosine-5-)-methyltransferase 3 alpha                       | miR-26a             |
| <i>DNPEP</i>    | aspartyl aminopeptidase                                           | mir-484             |
| <i>DOCK4</i>    | dedicator of cytokinesis 4                                        | miR-26a             |
| <i>DOCK9</i>    | dedicator of cytokinesis 9                                        | mir-484             |
| <i>DPH3</i>     | diphthamide biosynthesis 3                                        | mir-484             |
| <i>DRAM1</i>    | DNA-damage regulated autophagy modulator 1                        | miR-26a             |
| <i>DRD5</i>     | dopamine receptor D5                                              | mir-484             |
| <i>DST</i>      | dystonin                                                          | miR-26a             |
| <i>DTNA</i>     | dystrobrevin, alpha                                               | mir-484             |
| <i>DUSP5</i>    | dual specificity phosphatase 5                                    | miR-26a             |
| <i>DYRK1A</i>   | dual-specificity tyrosine-(Y)-phosphorylation regulated kinase 1A | miR-26a;<br>miR-222 |
| <i>E2F2</i>     | E2F transcription factor 2                                        | miR-222             |
| <i>E2F7</i>     | E2F transcription factor 7                                        | miR-26a             |
| <i>EAF1</i>     | ELL associated factor 1                                           | miR-26a             |
| <i>ECHDC3</i>   | enoyl CoA hydratase domain containing 3                           | mir-484             |
| <i>EDN2</i>     | endothelin 2                                                      | mir-484             |
| <i>EEF2K</i>    | eukaryotic elongation factor-2 kinase                             | mir-484             |
| <i>EFCAB11</i>  | EF-hand calcium binding domain 11                                 | mir-484             |
| <i>EFNB1</i>    | ephrin-B1                                                         | mir-484             |
| <i>EFNB2</i>    | ephrin-B2                                                         | mir-484             |
| <i>EFS</i>      | embryonal Fyn-associated substrate                                | mir-484             |
| <i>EHD1</i>     | EH-domain containing 1                                            | miR-26a             |

|                |                                                                                |                     |
|----------------|--------------------------------------------------------------------------------|---------------------|
| <i>EIF2S1</i>  | eukaryotic translation initiation factor 2, subunit 1 alpha, 35kDa             | miR-26a             |
| <i>EIF3A</i>   | eukaryotic translation initiation factor 3, subunit A                          | miR-26a             |
| <i>EIF3J</i>   | eukaryotic translation initiation factor 3, subunit J                          | miR-222             |
| <i>EIF4E3</i>  | eukaryotic translation initiation factor 4E family member 3                    | miR-222             |
| <i>EIF4G2</i>  | eukaryotic translation initiation factor 4 gamma, 2                            | miR-26a             |
| <i>EIF5</i>    | eukaryotic translation initiation factor 5                                     | miR-26a             |
| <i>EIF5A2</i>  | eukaryotic translation initiation factor 5A2                                   | miR-222             |
| <i>ELAVL2</i>  | ELAV like neuron-specific RNA binding protein 2                                | miR-26a;<br>miR-222 |
| <i>ELAVL3</i>  | ELAV like neuron-specific RNA binding protein 3                                | miR-26a             |
| <i>ELFN2</i>   | extracellular leucine-rich repeat and fibronectin type III domain containing 2 | mir-484             |
| <i>ELK1</i>    | ELK1, member of ETS oncogene family                                            | mir-484             |
| <i>ELP4</i>    | elongator acetyltransferase complex subunit 4                                  | miR-222             |
| <i>EMP2</i>    | epithelial membrane protein 2                                                  | mir-484             |
| <i>EMX1</i>    | empty spiracles homeobox 1                                                     | mir-484             |
| <i>ENC1</i>    | ectodermal-neural cortex 1 (with BTB domain)                                   | miR-26a             |
| <i>ENOX1</i>   | ecto-NOX disulfide-thiol exchanger 1                                           | miR-26a             |
| <i>ENPP5</i>   | ectonucleotide pyrophosphatase/phosphodiesterase 5 (putative)                  | mir-484             |
| <i>ENTPD7</i>  | ectonucleoside triphosphate diphosphohydrolase 7                               | miR-26a             |
| <i>EOMES</i>   | eomesodermin                                                                   | mir-484             |
| <i>EP300</i>   | E1A binding protein p300                                                       | miR-26a             |
| <i>EP400</i>   | E1A binding protein p400                                                       | miR-26a             |
| <i>EPAS1</i>   | endothelial PAS domain protein 1                                               | miR-26a             |
| <i>EPB41L3</i> | erythrocyte membrane protein band 4.1-like 3                                   | miR-26a             |
| <i>EPC1</i>    | enhancer of polycomb homolog 1 (Drosophila)                                    | miR-26a             |
| <i>EPC2</i>    | enhancer of polycomb homolog 2 (Drosophila)                                    | miR-26a             |
| <i>EPG5</i>    | ectopic P-granules autophagy protein 5 homolog (C. elegans)                    | miR-26a             |
| <i>EPGN</i>    | epithelial mitogen                                                             | mir-484             |
| <i>EPHA2</i>   | EPH receptor A2                                                                | miR-26a             |
| <i>EPHA5</i>   | EPH receptor A5                                                                | miR-26a             |
| <i>EPHA7</i>   | EPH receptor A7                                                                | miR-26a             |
| <i>EPS15</i>   | epidermal growth factor receptor pathway substrate 15                          | miR-26a;<br>miR-484 |
| <i>ERBB3</i>   | v-erb-b2 avian erythroblastic leukemia viral oncogene homolog 3                | mir-484             |
| <i>ERBB4</i>   | v-erb-b2 avian erythroblastic leukemia viral oncogene homolog 4                | miR-26a;<br>miR-222 |
| <i>ERC2</i>    | ELKS/RAB6-interacting/CAST family member 2                                     | miR-26a             |
| <i>ERLIN1</i>  | ER lipid raft associated 1                                                     | miR-26a             |
| <i>ERN2</i>    | endoplasmic reticulum to nucleus signaling 2                                   | mir-484             |
| <i>ERO1LB</i>  | ERO1-like beta (S. cerevisiae)                                                 | miR-26a;<br>miR-484 |

|                 |                                                                  |                     |
|-----------------|------------------------------------------------------------------|---------------------|
| <i>ESCO1</i>    | establishment of sister chromatid cohesion N-acetyltransferase 1 | miR-26a             |
| <i>ESR1</i>     | estrogen receptor 1                                              | miR-26a;<br>miR-222 |
| <i>ESRRG</i>    | estrogen-related receptor gamma                                  | miR-26a             |
| <i>ESYT1</i>    | extended synaptotagmin-like protein 1                            | mir-484             |
| <i>ETF1</i>     | eukaryotic translation termination factor 1                      | miR-26a             |
| <i>ETNK1</i>    | ethanolamine kinase 1                                            | miR-26a             |
| <i>ETS1</i>     | v-ets avian erythroblastosis virus E26 oncogene homolog 1        | miR-222             |
| <i>ETS2</i>     | v-ets avian erythroblastosis virus E26 oncogene homolog 2        | miR-222             |
| <i>ETV3</i>     | ets variant 3                                                    | miR-26a;<br>miR-222 |
| <i>ETV6</i>     | ets variant 6                                                    | mir-484             |
| <i>EVI2B</i>    | ecotropic viral integration site 2B                              | mir-484             |
| <i>EVX2</i>     | even-skipped homeobox 2                                          | miR-26a             |
| <i>EXOC5</i>    | exocyst complex component 5                                      | mir-484             |
| <i>EXOC8</i>    | exocyst complex component 8                                      | miR-26a             |
| <i>EXT1</i>     | exostosin glycosyltransferase 1                                  | miR-26a             |
| <i>EXT2</i>     | exostosin glycosyltransferase 2                                  | mir-484             |
| <i>EYA3</i>     | eyes absent homolog 3 (Drosophila)                               | miR-26a             |
| <i>EZH1</i>     | enhancer of zeste homolog 1 (Drosophila)                         | mir-484             |
| <i>EZH2</i>     | enhancer of zeste homolog 2 (Drosophila)                         | miR-26a             |
| <i>FA2H</i>     | fatty acid 2-hydroxylase                                         | miR-26a             |
| <i>FAF1</i>     | Fas (TNFRSF6) associated factor 1                                | miR-26a             |
| <i>FAIM3</i>    | Fas apoptotic inhibitory molecule 3                              | mir-484             |
| <i>FAM104A</i>  | family with sequence similarity 104, member A                    | mir-484             |
| <i>FAM110A</i>  | family with sequence similarity 110, member A                    | mir-484             |
| <i>FAM118A</i>  | family with sequence similarity 118, member A                    | miR-26a             |
| <i>FAM120A</i>  | family with sequence similarity 120A                             | miR-222;<br>miR-484 |
| <i>FAM120C</i>  | family with sequence similarity 120C                             | mir-484             |
| <i>FAM131B</i>  | family with sequence similarity 131, member B                    | mir-484             |
| <i>FAM136A</i>  | family with sequence similarity 136, member A                    | miR-26a             |
| <i>FAM160B2</i> | family with sequence similarity 160, member B2                   | mir-484             |
| <i>FAM167A</i>  | family with sequence similarity 167, member A                    | miR-222             |
| <i>FAM168B</i>  | family with sequence similarity 168, member B                    | mir-484             |
| <i>FAM169A</i>  | family with sequence similarity 169, member A                    | miR-26a             |
| <i>FAM178A</i>  | family with sequence similarity 178, member A                    | miR-26a             |
| <i>FAM187A</i>  | family with sequence similarity 187, member A                    | mir-484             |
| <i>FAM189B</i>  | family with sequence similarity 189, member B                    | mir-484             |
| <i>FAM196B</i>  | family with sequence similarity 196, member B                    | miR-26a;<br>miR-222 |
| <i>FAM208A</i>  | family with sequence similarity 208, member A                    | miR-222             |
| <i>FAM214A</i>  | family with sequence similarity 214, member A                    | miR-222             |
| <i>FAM214B</i>  | family with sequence similarity 214, member B                    | miR-26a             |

|                 |                                                                                   |                     |
|-----------------|-----------------------------------------------------------------------------------|---------------------|
| <i>FAM46B</i>   | family with sequence similarity 46, member B                                      | mir-484             |
| <i>FAM46C</i>   | family with sequence similarity 46, member C                                      | miR-26a             |
| <i>FAM49B</i>   | family with sequence similarity 49, member B                                      | miR-26a             |
| <i>FAM53A</i>   | family with sequence similarity 53, member A                                      | mir-484             |
| <i>FAM53B</i>   | family with sequence similarity 53, member B                                      | miR-222             |
| <i>FAM58A</i>   | family with sequence similarity 58, member A                                      | mir-484             |
| <i>FAM69C</i>   | family with sequence similarity 69, member C                                      | mir-484             |
| <i>FAM83D</i>   | family with sequence similarity 83, member D                                      | mir-484             |
| <i>FAM84A</i>   | family with sequence similarity 84, member A                                      | mir-484             |
| <i>FAM98A</i>   | family with sequence similarity 98, member A                                      | miR-26a             |
| <i>FAM98B</i>   | family with sequence similarity 98, member B                                      | miR-26a             |
| <i>FANCA</i>    | Fanconi anemia, complementation group A                                           | miR-26a             |
| <i>FAT2</i>     | FAT atypical cadherin 2                                                           | miR-222             |
| <i>FBN2</i>     | fibrillin 2                                                                       | miR-222             |
| <i>FBRS</i>     | fibrosin                                                                          | mir-484             |
| <i>FBXL19</i>   | F-box and leucine-rich repeat protein 19                                          | miR-26a             |
| <i>FBXO11</i>   | F-box protein 11                                                                  | miR-26a;<br>miR-484 |
| <i>FBXO28</i>   | F-box protein 28                                                                  | miR-26a;<br>miR-222 |
| <i>FBXO3</i>    | F-box protein 3                                                                   | miR-222             |
| <i>FBXO42</i>   | F-box protein 42                                                                  | miR-26a             |
| <i>FBXO48</i>   | F-box protein 48                                                                  | miR-26a             |
| <i>FGD1</i>     | FYVE, RhoGEF and PH domain containing 1                                           | miR-26a             |
| <i>FGF14</i>    | fibroblast growth factor 14                                                       | miR-222             |
| <i>FIGN</i>     | fidgetin                                                                          | miR-26a;<br>miR-222 |
| <i>FITM2</i>    | fat storage-inducing transmembrane protein 2                                      | mir-484             |
| <i>FKBP3</i>    | FK506 binding protein 3, 25kDa                                                    | miR-26a             |
| <i>FLT3</i>     | fms-related tyrosine kinase 3                                                     | mir-484             |
| <i>FMR1</i>     | fragile X mental retardation 1                                                    | miR-222             |
| <i>FNDC3A</i>   | fibronectin type III domain containing 3A                                         | miR-222             |
| <i>FNIP1</i>    | folliculin interacting protein 1                                                  | miR-26a             |
| <i>FNIP2</i>    | folliculin interacting protein 2                                                  | miR-222             |
| <i>FOLR2</i>    | folate receptor 2 (fetal)                                                         | mir-484             |
| <i>FOS</i>      | FBJ murine osteosarcoma viral oncogene homolog                                    | miR-222             |
| <i>FOSL2</i>    | FOS-like antigen 2                                                                | miR-26a             |
| <i>FOXJ1</i>    | forkhead box J1                                                                   | mir-484             |
| <i>FOKK1</i>    | forkhead box K1                                                                   | mir-484             |
| <i>FOXP1</i>    | forkhead box N1                                                                   | miR-26a             |
| <i>FOXP2</i>    | forkhead box N2                                                                   | miR-222             |
| <i>FPGT</i>     | forkhead box P1                                                                   | miR-222             |
| <i>FRA10AC1</i> | forkhead box P2                                                                   | miR-26a;<br>miR-222 |
|                 | fucose-1-phosphate guanylyltransferase                                            | mir-484             |
|                 | fragile site, folic acid type, rare, fra(10)(q23.3) or fra(10)(q24.2) candidate 1 | miR-26a             |

|                 |                                                                                                  |                     |
|-----------------|--------------------------------------------------------------------------------------------------|---------------------|
| <i>FRAT2</i>    | frequently rearranged in advanced T-cell lymphomas 2                                             | miR-26a             |
| <i>FRK</i>      | fyn-related kinase                                                                               | miR-26a             |
| <i>FRMD4B</i>   | FERM domain containing 4B                                                                        | miR-26a             |
| <i>FRMPD3</i>   | FERM and PDZ domain containing 3                                                                 | mir-484             |
| <i>FRRS1L</i>   | ferric-chelate reductase 1-like                                                                  | miR-222             |
| <i>FRS2</i>     | fibroblast growth factor receptor substrate 2                                                    | miR-222             |
| <i>FST</i>      | follistatin                                                                                      | mir-484             |
| <i>FUBP1</i>    | far upstream element (FUSE) binding protein 1                                                    | miR-26a             |
| <i>FUT10</i>    | fucosyltransferase 10 (alpha (1,3) fucosyltransferase)                                           | mir-484             |
| <i>FUT4</i>     | fucosyltransferase 4 (alpha (1,3) fucosyltransferase, myeloid-specific)                          | mir-484             |
| <i>FUT9</i>     | fucosyltransferase 9 (alpha (1,3) fucosyltransferase)                                            | miR-26a;<br>miR-484 |
| <i>G2E3</i>     | G2/M-phase specific E3 ubiquitin protein ligase                                                  | miR-26a             |
| <i>G3BP2</i>    | GTPase activating protein (SH3 domain) binding protein 2                                         | miR-26a             |
| <i>GAB1</i>     | GRB2-associated binding protein 1                                                                | miR-222             |
| <i>GABRA1</i>   | gamma-aminobutyric acid (GABA) A receptor, alpha 1                                               | miR-222             |
| <i>GABRA4</i>   | gamma-aminobutyric acid (GABA) A receptor, alpha 4                                               | miR-26a             |
| <i>GAD2</i>     | glutamate decarboxylase 2 (pancreatic islets and brain, 65kDa)                                   | miR-26a             |
| <i>GALNT10</i>  | UDP-N-acetyl-alpha-D-galactosamine:polypeptide N-acetylgalactosaminyltransferase 10 (GalNAc-T10) | miR-26a;<br>miR-484 |
| <i>GALNT16</i>  | UDP-N-acetyl-alpha-D-galactosamine:polypeptide N-acetylgalactosaminyltransferase 16              | mir-484             |
| <i>GALNT18</i>  | UDP-N-acetyl-alpha-D-galactosamine:polypeptide N-acetylgalactosaminyltransferase 18              | miR-222             |
| <i>GALNT7</i>   | UDP-N-acetyl-alpha-D-galactosamine:polypeptide N-acetylgalactosaminyltransferase 7 (GalNAc-T7)   | miR-26a             |
| <i>GAN</i>      | gigaxonin                                                                                        | miR-26a             |
| <i>GAREM</i>    | GRB2 associated, regulator of MAPK1                                                              | mir-484             |
| <i>GATA4</i>    | GATA binding protein 4                                                                           | miR-26a             |
| <i>GCDH</i>     | glutaryl-CoA dehydrogenase                                                                       | mir-484             |
| <i>GDF11</i>    | growth differentiation factor 11                                                                 | miR-26a;<br>miR-484 |
| <i>GEMIN8</i>   | gem (nuclear organelle) associated protein 8                                                     | mir-484             |
| <i>GIGYF1</i>   | GRB10 interacting GYF protein 1                                                                  | mir-484             |
| <i>GINS2</i>    | GINS complex subunit 2 (Psf2 homolog)                                                            | mir-484             |
| <i>GIPC2</i>    | GIPC PDZ domain containing family, member 2                                                      | mir-484             |
| <i>GIPC3</i>    | GIPC PDZ domain containing family, member 3                                                      | mir-484             |
| <i>GJA3</i>     | gap junction protein, alpha 3, 46kDa                                                             | miR-26a             |
| <i>GJA9</i>     | gap junction protein, alpha 9, 59kDa                                                             | miR-26a             |
| <i>GLCE</i>     | glucuronic acid epimerase                                                                        | mir-484             |
| <i>GLTSCR1L</i> | GLTSCR1-like                                                                                     | miR-26a             |
| <i>GMDS</i>     | GDP-mannose 4,6-dehydratase                                                                      | miR-26a             |
| <i>GMEB1</i>    | glucocorticoid modulatory element binding protein 1                                              | miR-26a             |
| <i>GMEB2</i>    | glucocorticoid modulatory element binding protein 2                                              | mir-484             |

|                |                                                                                         |                     |
|----------------|-----------------------------------------------------------------------------------------|---------------------|
| <i>GMFB</i>    | glia maturation factor, beta                                                            | miR-26a             |
| <i>GNA13</i>   | guanine nucleotide binding protein (G protein), alpha 13                                | miR-26a             |
| <i>GNAI2</i>   | guanine nucleotide binding protein (G protein), alpha inhibiting activity polypeptide 2 | miR-222             |
| <i>GNB2L1</i>  | guanine nucleotide binding protein (G protein), beta polypeptide 2-like 1               | mir-484             |
| <i>GNE</i>     | glucosamine (UDP-N-acetyl)-2-epimerase/N-acetyl-mannosamine kinase                      | mir-484             |
| <i>GNPNAT1</i> | glucosamine-phosphate N-acetyltransferase 1                                             | miR-26a             |
| <i>GOSR2</i>   | golgi SNAP receptor complex member 2                                                    | mir-484             |
| <i>GPBP1</i>   | GC-rich promoter binding protein 1                                                      | miR-222             |
| <i>GPC1</i>    | glypican 1                                                                              | mir-484             |
| <i>GPC4</i>    | glypican 4                                                                              | miR-26a             |
| <i>GPCPD1</i>  | glycerophosphocholine phosphodiesterase GDE1 homolog ( <i>S. cerevisiae</i> )           | mir-484             |
| <i>GPM6A</i>   | glycoprotein M6A                                                                        | miR-222             |
| <i>GPR133</i>  | G protein-coupled receptor 133                                                          | mir-484             |
| <i>GPR146</i>  | G protein-coupled receptor 146                                                          | miR-26a             |
| <i>GPR157</i>  | G protein-coupled receptor 157                                                          | mir-484             |
| <i>GPR161</i>  | G protein-coupled receptor 161                                                          | miR-26a             |
| <i>GPSM1</i>   | G-protein signaling modulator 1                                                         | miR-26a             |
| <i>GRB10</i>   | growth factor receptor-bound protein 10                                                 | miR-26a;<br>miR-484 |
| <i>GRB2</i>    | growth factor receptor-bound protein 2                                                  | mir-484             |
| <i>GREB1L</i>  | growth regulation by estrogen in breast cancer-like                                     | miR-26a;<br>miR-484 |
| <i>GRHL3</i>   | grainyhead-like 3 ( <i>Drosophila</i> )                                                 | miR-26a             |
| <i>GRID2IP</i> | glutamate receptor, ionotropic, delta 2 (Grid2) interacting protein                     | mir-484             |
| <i>GRIN2A</i>  | glutamate receptor, ionotropic, N-methyl D-aspartate 2A                                 | miR-26a             |
| <i>GRIN2B</i>  | glutamate receptor, ionotropic, N-methyl D-aspartate 2B                                 | miR-26a             |
| <i>GRK7</i>    | G protein-coupled receptor kinase 7                                                     | mir-484             |
| <i>GRM1</i>    | glutamate receptor, metabotropic 1                                                      | miR-222             |
| <i>GRSF1</i>   | G-rich RNA sequence binding factor 1                                                    | miR-26a             |
| <i>GRWD1</i>   | glutamate-rich WD repeat containing 1                                                   | mir-484             |
| <i>GSK3B</i>   | glycogen synthase kinase 3 beta                                                         | miR-26a             |
| <i>GSPT1</i>   | G1 to S phase transition 1                                                              | mir-484             |
| <i>GSTCD</i>   | glutathione S-transferase, C-terminal domain containing                                 | mir-484             |
| <i>GTDC1</i>   | glycosyltransferase-like domain containing 1                                            | mir-484             |
| <i>GTF3C2</i>  | general transcription factor IIIC, polypeptide 2, beta 110kDa                           | miR-26a             |
| <i>GTF3C5</i>  | general transcription factor IIIC, polypeptide 5, 63kDa                                 | mir-484             |
| <i>GTPBP10</i> | GTP-binding protein 10 (putative)                                                       | mir-484             |
| <i>GXYLT1</i>  | glucoside xylosyltransferase 1                                                          | mir-484             |



|                 |                                                                                         |                     |
|-----------------|-----------------------------------------------------------------------------------------|---------------------|
| <i>GZF1</i>     | GDNF-inducible zinc finger protein 1                                                    | mir-484             |
| <i>H3F3A</i>    | H3 histone, family 3A                                                                   | miR-222             |
| <i>HAO1</i>     | hydroxyacid oxidase (glycolate oxidase) 1                                               | miR-26a             |
| <i>HAPLN1</i>   | hyaluronan and proteoglycan link protein 1                                              | miR-26a             |
| <i>HAS2</i>     | hyaluronan synthase 2                                                                   | miR-26a             |
| <i>HAS3</i>     | hyaluronan synthase 3                                                                   | miR-26a             |
| <i>HCN4</i>     | hyperpolarization activated cyclic nucleotide-gated potassium channel 4                 | mir-484             |
| <i>HECTD2</i>   | HECT domain containing E3 ubiquitin protein ligase 2                                    | miR-222             |
| <i>HECTD3</i>   | HECT domain containing E3 ubiquitin protein ligase 3                                    | miR-26a;<br>miR-484 |
| <i>HECTD4</i>   | HECT domain containing E3 ubiquitin protein ligase 4                                    | miR-26a             |
| <i>HEG1</i>     | heart development protein with EGF-like domains 1                                       | miR-222             |
| <i>HELZ</i>     | helicase with zinc finger                                                               | miR-26a             |
| <i>HEPHL1</i>   | hephaestin-like 1                                                                       | miR-26a             |
| <i>HGF</i>      | hepatocyte growth factor (hepapoietin A; scatter factor)                                | miR-26a             |
| <i>HIAT1</i>    | hippocampus abundant transcript 1                                                       | miR-26a             |
| <i>HIC1</i>     | hypermethylated in cancer 1                                                             | mir-484             |
| <i>HIC2</i>     | hypermethylated in cancer 2                                                             | mir-484             |
| <i>HIF1A</i>    | hypoxia inducible factor 1, alpha subunit (basic helix-loop-helix transcription factor) | mir-484             |
| <i>HIF1AN</i>   | hypoxia inducible factor 1, alpha subunit inhibitor                                     | mir-484             |
| <i>HIPK1</i>    | homeodomain interacting protein kinase 1                                                | miR-26a;<br>miR-222 |
| <i>HIPK2</i>    | homeodomain interacting protein kinase 2                                                | miR-26a;<br>miR-222 |
| <i>HIPK3</i>    | homeodomain interacting protein kinase 3                                                | miR-222             |
| <i>HIRA</i>     | histone cell cycle regulator                                                            | mir-484             |
| <i>HM13</i>     | histocompatibility (minor) 13                                                           | mir-484             |
| <i>HMBOX1</i>   | homeobox containing 1                                                                   | miR-26a;<br>miR-222 |
| <i>HMGA1</i>    | high mobility group AT-hook 1                                                           | miR-26a             |
| <i>HMGA2</i>    | high mobility group AT-hook 2                                                           | miR-26a             |
| <i>HMGCR</i>    | 3-hydroxy-3-methylglutaryl-CoA reductase                                                | mir-484             |
| <i>HNF1A</i>    | HNF1 homeobox A                                                                         | mir-484             |
| <i>HNRNPA0</i>  | heterogeneous nuclear ribonucleoprotein A0                                              | miR-222             |
| <i>HNRNPA3</i>  | heterogeneous nuclear ribonucleoprotein A3                                              | miR-222             |
| <i>HNRNPUL1</i> | heterogeneous nuclear ribonucleoprotein U-like 1                                        | miR-26a             |
| <i>HOMER1</i>   | homer homolog 1 (Drosophila)                                                            | miR-26a;<br>miR-484 |
| <i>HOOK1</i>    | hook microtubule-tethering protein 1                                                    | miR-26a             |
| <i>HOXA5</i>    | homeobox A5                                                                             | miR-26a             |
| <i>HOXA7</i>    | homeobox A7                                                                             | miR-222             |
| <i>HOXA9</i>    | homeobox A9                                                                             | miR-26a             |
| <i>HOXD12</i>   | homeobox D12                                                                            | mir-484             |
| <i>HOXD13</i>   | homeobox D13                                                                            | miR-26a             |
| <i>HOXD4</i>    | homeobox D4                                                                             | miR-26a;            |

|                 |                                                                |                                 |
|-----------------|----------------------------------------------------------------|---------------------------------|
|                 |                                                                | miR-484                         |
| <i>HPGD</i>     | hydroxyprostaglandin dehydrogenase 15-(NAD)                    | miR-26a                         |
| <i>HRH1</i>     | histamine receptor H1                                          | mir-484                         |
| <i>HS2ST1</i>   | heparan sulfate 2-O-sulfotransferase 1                         | miR-26a;<br>miR-484             |
| <i>HS6ST1</i>   | heparan sulfate 6-O-sulfotransferase 1                         | miR-26a                         |
| <i>HSDL1</i>    | hydroxysteroid dehydrogenase like 1                            | mir-484                         |
| <i>HSDL2</i>    | hydroxysteroid dehydrogenase like 2                            | miR-26a                         |
| <i>HSH2D</i>    | hematopoietic SH2 domain containing                            | mir-484                         |
| <i>HSPA12B</i>  | heat shock 70kD protein 12B                                    | mir-484                         |
| <i>HSPA13</i>   | heat shock protein 70kDa family, member 13                     | miR-26a                         |
| <i>HTR2A</i>    | 5-hydroxytryptamine (serotonin) receptor 2A, G protein-coupled | miR-26a                         |
| <i>HVCN1</i>    | hydrogen voltage-gated channel 1                               | mir-484                         |
| <i>HYAL2</i>    | hyaluronoglucosaminidase 2                                     | mir-484                         |
| <i>ICOS</i>     | inducible T-cell co-stimulator                                 | miR-26a;<br>miR-484             |
| <i>IGDCC4</i>   | immunoglobulin superfamily, DCC subclass, member 4             | mir-484                         |
| <i>IGF1</i>     | insulin-like growth factor 1 (somatomedin C)                   | miR-26a                         |
| <i>IGF2BP1</i>  | insulin-like growth factor 2 mRNA binding protein 1            | mir-484                         |
| <i>IGF2BP2</i>  | insulin-like growth factor 2 mRNA binding protein 2            | miR-222                         |
| <i>IGFBP3</i>   | insulin-like growth factor binding protein 3                   | mir-484                         |
| <i>IGFBP5</i>   | insulin-like growth factor binding protein 5                   | mir-484                         |
| <i>IGFBPL1</i>  | insulin-like growth factor binding protein-like 1              | mir-484                         |
| <i>IGLON5</i>   | IgLON family member 5                                          | mir-484                         |
| <i>IGSF10</i>   | immunoglobulin superfamily, member 10                          | miR-26a                         |
| <i>IGSF3</i>    | immunoglobulin superfamily, member 3                           | miR-26a;<br>miR-222;<br>miR-484 |
| <i>IHH</i>      | indian hedgehog                                                | mir-484                         |
| <i>IKZF2</i>    | IKAROS family zinc finger 2 (Helios)                           | mir-484                         |
| <i>IKZF4</i>    | IKAROS family zinc finger 4 (Eos)                              | miR-222                         |
| <i>IL10RA</i>   | interleukin 10 receptor, alpha                                 | mir-484                         |
| <i>IL1RAPL1</i> | interleukin 1 receptor accessory protein-like 1                | miR-222                         |
| <i>IL20</i>     | interleukin 20                                                 | miR-26a                         |
| <i>IL20RB</i>   | interleukin 20 receptor beta                                   | mir-484                         |
| <i>IL31</i>     | interleukin 31                                                 | mir-484                         |
| <i>IL6R</i>     | interleukin 6 receptor                                         | mir-484                         |
| <i>ILF2</i>     | interleukin enhancer binding factor 2                          | mir-484                         |
| <i>INHBA</i>    | inhibin, beta A                                                | miR-26a                         |
| <i>INHBB</i>    | inhibin, beta B                                                | miR-26a                         |
| <i>INSIG1</i>   | insulin induced gene 1                                         | miR-222                         |
| <i>INTS2</i>    | integrator complex subunit 2                                   | miR-26a                         |
| <i>INTU</i>     | inturned planar cell polarity protein                          | miR-26a                         |
| <i>IPMK</i>     | inositol polyphosphate multikinase                             | miR-26a                         |
| <i>IPO7</i>     | importin 7                                                     | miR-26a;                        |

|                   |                                                                                           |                     |
|-------------------|-------------------------------------------------------------------------------------------|---------------------|
|                   |                                                                                           | miR-222             |
| <i>IPPK</i>       | inositol 1,3,4,5,6-pentakisphosphate 2-kinase                                             | miR-26a             |
| <i>IQCH</i>       | IQ motif containing H                                                                     | mir-484             |
| <i>IQCJ</i>       | IQ motif containing J                                                                     | mir-484             |
| <i>IRF2</i>       | interferon regulatory factor 2                                                            | miR-222             |
| <i>IRGQ</i>       | immunity-related GTPase family, Q                                                         | mir-484             |
| <i>IRX5</i>       | iroquois homeobox 5                                                                       | miR-222             |
| <i>ISY1-RAB43</i> | ISY1-RAB43 readthrough                                                                    | mir-484             |
| <i>ITGA5</i>      | integrin, alpha 5 (fibronectin receptor, alpha polypeptide)                               | miR-26a             |
| <i>ITGB8</i>      | integrin, beta 8                                                                          | miR-26a;<br>miR-222 |
| <i>ITPKB</i>      | inositol-trisphosphate 3-kinase B                                                         | mir-484             |
| <i>ITPR1</i>      | inositol 1,4,5-trisphosphate receptor, type 1                                             | miR-26a             |
| <i>ITPRIPL1</i>   | inositol 1,4,5-trisphosphate receptor interacting protein-like 1                          | miR-26a             |
| <i>JAG1</i>       | jagged 1                                                                                  | miR-26a             |
| <i>JAKMIP2</i>    | janus kinase and microtubule interacting protein 2                                        | miR-26a             |
| <i>JAM3</i>       | junctional adhesion molecule 3                                                            | miR-26a             |
| <i>JARID2</i>     | jumonji, AT rich interactive domain 2                                                     | miR-26a             |
| <i>JPH4</i>       | junctophilin 4                                                                            | mir-484             |
| <i>KALRN</i>      | kalirin, RhoGEF kinase                                                                    | mir-484             |
| <i>KANSL1</i>     | KAT8 regulatory NSL complex subunit 1                                                     | miR-222             |
| <i>KAZN</i>       | kazrin, periplakin interacting protein                                                    | miR-26a;<br>miR-484 |
| <i>KBTBD13</i>    | kelch repeat and BTB (POZ) domain containing 13                                           | mir-484             |
| <i>KBTBD8</i>     | kelch repeat and BTB (POZ) domain containing 8                                            | miR-26a;<br>miR-484 |
| <i>KCMF1</i>      | potassium channel modulatory factor 1                                                     | miR-26a             |
| <i>KCNA5</i>      | potassium voltage-gated channel, shaker-related subfamily, member 5                       | mir-484             |
| <i>KCNC3</i>      | potassium voltage-gated channel, Shaw-related subfamily, member 3                         | mir-484             |
| <i>KCNE4</i>      | potassium voltage-gated channel, Isk-related family, member 4                             | miR-26a             |
| <i>KCNH7</i>      | potassium voltage-gated channel, subfamily H (eag-related), member 7                      | miR-26a             |
| <i>KCNJ2</i>      | potassium inwardly-rectifying channel, subfamily J, member 2                              | miR-26a             |
| <i>KCNK1</i>      | potassium channel, subfamily K, member 1                                                  | miR-26a             |
| <i>KCNK13</i>     | potassium channel, subfamily K, member 13                                                 | mir-484             |
| <i>KCNN3</i>      | potassium intermediate/small conductance calcium-activated channel, subfamily N, member 3 | miR-26a             |
| <i>KCNQ3</i>      | potassium voltage-gated channel, KQT-like subfamily, member 3                             | miR-222             |
| <i>KCNQ4</i>      | potassium voltage-gated channel, KQT-like subfamily, member 4                             | miR-26a             |
| <i>KCTD10</i>     | potassium channel tetramerization domain containing 10                                    | mir-484             |

|                |                                                                     |                     |
|----------------|---------------------------------------------------------------------|---------------------|
| <i>KCTD18</i>  | potassium channel tetramerization domain containing 18              | miR-26a             |
| <i>KCTD3</i>   | potassium channel tetramerization domain containing 3               | mir-484             |
| <i>KDM4A</i>   | lysine (K)-specific demethylase 4A                                  | mir-484             |
| <i>KDM5B</i>   | lysine (K)-specific demethylase 5B                                  | mir-484             |
| <i>KDM6A</i>   | lysine (K)-specific demethylase 6A                                  | miR-26a             |
| <i>KDR</i>     | kinase insert domain receptor (a type III receptor tyrosine kinase) | miR-222             |
| <i>KHDRBS2</i> | KH domain containing, RNA binding, signal transduction associated 2 | miR-222             |
| <i>KIF16B</i>  | kinesin family member 16B                                           | miR-222             |
| <i>KIF21B</i>  | kinesin family member 21B                                           | miR-26a             |
| <i>KIF2A</i>   | kinesin heavy chain member 2A                                       | mir-484             |
| <i>KIF6</i>    | kinesin family member 6                                             | mir-484             |
| <i>KIT</i>     | v-kit Hardy-Zuckerman 4 feline sarcoma viral oncogene homolog       | miR-222             |
| <i>KLF10</i>   | Kruppel-like factor 10                                              | miR-26a             |
| <i>KLF4</i>    | Kruppel-like factor 4 (gut)                                         | miR-26a             |
| <i>KLF7</i>    | Kruppel-like factor 7 (ubiquitous)                                  | miR-26a;<br>miR-222 |
| <i>KLHL15</i>  | kelch-like family member 15                                         | miR-26a             |
| <i>KLHL18</i>  | kelch-like family member 18                                         | miR-26a             |
| <i>KLHL2</i>   | kelch-like family member 2                                          | mir-484             |
| <i>KLHL22</i>  | kelch-like family member 22                                         | mir-484             |
| <i>KLHL42</i>  | kelch-like family member 42                                         | miR-26a             |
| <i>KMT2A</i>   | lysine (K)-specific methyltransferase 2A                            | miR-222;<br>miR-484 |
| <i>KMT2C</i>   | lysine (K)-specific methyltransferase 2C                            | miR-26a;<br>miR-222 |
| <i>KNDC1</i>   | kinase non-catalytic C-lobe domain (KIND) containing 1              | mir-484             |
| <i>KPNA2</i>   | karyopherin alpha 2 (RAG cohort 1, importin alpha 1)                | miR-26a;<br>miR-222 |
| <i>KPNA3</i>   | karyopherin alpha 3 (importin alpha 4)                              | miR-26a             |
| <i>KPNA5</i>   | karyopherin alpha 5 (importin alpha 6)                              | miR-26a             |
| <i>KPNA6</i>   | karyopherin alpha 6 (importin alpha 7)                              | miR-26a             |
| <i>KRBA1</i>   | KRAB-A domain containing 1                                          | mir-484             |
| <i>KRT1</i>    | keratin 1                                                           | mir-484             |
| <i>KRT222</i>  | keratin 222                                                         | miR-26a             |
| <i>KRTCAP3</i> | keratinocyte associated protein 3                                   | mir-484             |
| <i>KSR1</i>    | kinase suppressor of ras 1                                          | miR-222             |
| <i>LAMC3</i>   | laminin, gamma 3                                                    | mir-484             |
| <i>LARP1</i>   | La ribonucleoprotein domain family, member 1                        | miR-26a             |
| <i>LARP4</i>   | La ribonucleoprotein domain family, member 4                        | miR-26a             |
| <i>LARP4B</i>  | La ribonucleoprotein domain family, member 4B                       | miR-26a             |
| <i>LCN6</i>    | lipocalin 6                                                         | mir-484             |
| <i>LDLR</i>    | low density lipoprotein receptor                                    | mir-484             |

|                |                                                                     |         |
|----------------|---------------------------------------------------------------------|---------|
| <i>LEF1</i>    | lymphoid enhancer-binding factor 1                                  | miR-26a |
| <i>LETM1</i>   | leucine zipper-EF-hand containing transmembrane protein 1           | mir-484 |
| <i>LGI2</i>    | leucine-rich repeat LGI family, member 2                            | mir-484 |
| <i>LHFP</i>    | lipoma HMGIC fusion partner                                         | mir-484 |
| <i>LHFPL2</i>  | lipoma HMGIC fusion partner-like 2                                  | miR-222 |
| <i>LHFPL4</i>  | lipoma HMGIC fusion partner-like 4                                  | miR-26a |
| <i>LHX1</i>    | LIM homeobox 1                                                      | miR-26a |
| <i>LHX8</i>    | LIM homeobox 8                                                      | miR-222 |
| <i>LIF</i>     | leukemia inhibitory factor                                          | mir-484 |
| <i>LIFR</i>    | leukemia inhibitory factor receptor alpha                           | miR-222 |
| <i>LIG3</i>    | ligase III, DNA, ATP-dependent                                      | mir-484 |
| <i>LIMK2</i>   | LIM domain kinase 2                                                 | mir-484 |
| <i>LIN52</i>   | lin-52 homolog (C. elegans)                                         | miR-26a |
| <i>LIN54</i>   | lin-54 homolog (C. elegans)                                         | mir-484 |
| <i>LINGO1</i>  | leucine rich repeat and Ig domain containing 1                      | miR-26a |
| <i>LMAN1</i>   | lectin, mannose-binding, 1                                          | miR-26a |
| <i>LMLN</i>    | leishmanolysin-like (metallopeptidase M8 family)                    | miR-26a |
| <i>LMX1A</i>   | LIM homeobox transcription factor 1, alpha                          | miR-222 |
| <i>LNPEP</i>   | leucyl/cystinyl aminopeptidase                                      | miR-26a |
| <i>LNX2</i>    | ligand of numb-protein X 2                                          | miR-26a |
| <i>LONRF3</i>  | LON peptidase N-terminal domain and ring finger 3                   | mir-484 |
| <i>LOX</i>     | lysyl oxidase                                                       | miR-26a |
| <i>LOXL2</i>   | lysyl oxidase-like 2                                                | miR-26a |
| <i>LPHN1</i>   | latrophilin 1                                                       | miR-26a |
| <i>LPP</i>     | LIM domain containing preferred translocation partner in lipoma     | miR-26a |
| <i>LPPR1</i>   | Lipid phosphate phosphatase-related protein type 1                  | miR-222 |
| <i>LRCH1</i>   | leucine-rich repeats and calponin homology (CH) domain containing 1 | miR-26a |
| <i>LRFN2</i>   | leucine rich repeat and fibronectin type III domain containing 2    | miR-222 |
| <i>LRRC14</i>  | leucine rich repeat containing 14                                   | miR-222 |
| <i>LRRC15</i>  | leucine rich repeat containing 15                                   | mir-484 |
| <i>LRRC16A</i> | leucine rich repeat containing 16A                                  | miR-26a |
| <i>LRRC3</i>   | leucine rich repeat containing 3                                    | mir-484 |
| <i>LRRC41</i>  | leucine rich repeat containing 41                                   | mir-484 |
| <i>LRRC56</i>  | leucine rich repeat containing 56                                   | mir-484 |
| <i>LRRC59</i>  | leucine rich repeat containing 59                                   | miR-26a |
| <i>LRRFIP1</i> | leucine rich repeat (in FLII) interacting protein 1                 | mir-484 |
| <i>LSM11</i>   | LSM11, U7 small nuclear RNA associated                              | miR-26a |
| <i>LSM12</i>   | LSM12 homolog (S. cerevisiae)                                       | miR-26a |
| <i>LTBP1</i>   | latent transforming growth factor beta binding protein 1            | miR-26a |
| <i>LUC7L3</i>  | LUC7-like 3 (S. cerevisiae)                                         | miR-222 |
| <i>LUZP1</i>   | leucine zipper protein 1                                            | mir-484 |
| <i>LUZP6</i>   | leucine zipper protein 6                                            | miR-26a |

|                 |                                                                               |                     |
|-----------------|-------------------------------------------------------------------------------|---------------------|
| <i>LY6D</i>     | lymphocyte antigen 6 complex, locus D                                         | mir-484             |
| <i>LYPLA2</i>   | lysophospholipase II                                                          | mir-484             |
| <i>LYRM9</i>    | LYR motif containing 9                                                        | mir-484             |
| <i>LYSMD3</i>   | LysM, putative peptidoglycan-binding, domain containing 3                     | mir-484             |
| <i>LZIC</i>     | leucine zipper and CTNNBIP1 domain containing                                 | mir-484             |
| <i>MAB21L1</i>  | mab-21-like 1 ( <i>C. elegans</i> )                                           | miR-26a             |
| <i>MAFK</i>     | v-maf avian musculoaponeurotic fibrosarcoma oncogene homolog K                | mir-484             |
| <i>MAGI1</i>    | membrane associated guanylate kinase, WW and PDZ domain containing 1          | miR-222             |
| <i>MAGI2</i>    | membrane associated guanylate kinase, WW and PDZ domain containing 2          | miR-222             |
| <i>MAGI3</i>    | membrane associated guanylate kinase, WW and PDZ domain containing 3          | miR-26a             |
| <i>MAL2</i>     | mal, T-cell differentiation protein 2 (gene/pseudogene)                       | miR-26a             |
| <i>MAML1</i>    | mastermind-like 1 ( <i>Drosophila</i> )                                       | mir-484             |
| <i>MAN1A2</i>   | mannosidase, alpha, class 1A, member 2                                        | miR-26a             |
| <i>MAN2A1</i>   | mannosidase, alpha, class 2A, member 1                                        | miR-26a             |
| <i>MANBA</i>    | mannosidase, beta A, lysosomal                                                | mir-484             |
| <i>MANEAL</i>   | mannosidase, endo-alpha-like                                                  | mir-484             |
| <i>MANF</i>     | mesencephalic astrocyte-derived neurotrophic factor                           | mir-484             |
| <i>MAP1A</i>    | microtubule-associated protein 1A                                             | miR-26a             |
| <i>MAP1B</i>    | microtubule-associated protein 1B                                             | miR-26a             |
| <i>MAP2</i>     | microtubule-associated protein 2                                              | miR-26a             |
| <i>MAP3K1</i>   | mitogen-activated protein kinase kinase kinase 1, E3 ubiquitin protein ligase | miR-26a             |
| <i>MAP3K11</i>  | mitogen-activated protein kinase kinase kinase 11                             | mir-484             |
| <i>MAP3K2</i>   | mitogen-activated protein kinase kinase kinase 2                              | miR-26a             |
| <i>MAP3K9</i>   | mitogen-activated protein kinase kinase kinase 9                              | miR-26a             |
| <i>MAP7</i>     | microtubule-associated protein 7                                              | miR-26a             |
| <i>MAP9</i>     | microtubule-associated protein 9                                              | miR-26a             |
| <i>MAPK10</i>   | mitogen-activated protein kinase 10                                           | miR-222             |
| <i>MAPK6</i>    | mitogen-activated protein kinase 6                                            | miR-26a;<br>miR-222 |
| <i>MAPK9</i>    | mitogen-activated protein kinase 9                                            | mir-484             |
| <i>MAPKAPK2</i> | mitogen-activated protein kinase-activated protein kinase 2                   | mir-484             |
| <i>MARCH5</i>   | membrane-associated ring finger (C3HC4) 5                                     | mir-484             |
| <i>MARK1</i>    | MAP/microtubule affinity-regulating kinase 1                                  | miR-26a;<br>miR-222 |
| <i>MAT2A</i>    | methionine adenosyltransferase II, alpha                                      | miR-26a             |
| <i>MATR3</i>    | matrin 3                                                                      | miR-26a             |
| <i>MB</i>       | myoglobin                                                                     | mir-484             |
| <i>MBD2</i>     | methyl-CpG binding domain protein 2                                           | miR-222             |
| <i>MBTD1</i>    | mbt domain containing 1                                                       | mir-484             |
| <i>MCC</i>      | mutated in colorectal cancers                                                 | miR-26a             |
| <i>MCL1</i>     | myeloid cell leukemia sequence 1 (BCL2-related)                               | miR-26a             |

|                |                                                                                                |                     |
|----------------|------------------------------------------------------------------------------------------------|---------------------|
| <i>MCM2</i>    | minichromosome maintenance complex component 2                                                 | mir-484             |
| <i>MDN1</i>    | MDN1, midasin homolog (yeast)                                                                  | miR-26a             |
| <i>MED13L</i>  | mediator complex subunit 13-like                                                               | miR-26a             |
| <i>MED6</i>    | mediator complex subunit 6                                                                     | mir-484             |
| <i>MEF2C</i>   | myocyte enhancer factor 2C                                                                     | miR-26a             |
| <i>MEGF9</i>   | multiple EGF-like-domains 9                                                                    | miR-26a;<br>miR-222 |
| <i>MEIS1</i>   | Meis homeobox 1                                                                                | miR-222             |
| <i>MESDC1</i>  | mesoderm development candidate 1                                                               | miR-222             |
| <i>METTL2A</i> | methyltransferase like 2A                                                                      | mir-484             |
| <i>MEX3A</i>   | mex-3 RNA binding family member A                                                              | miR-222             |
| <i>MEX3B</i>   | mex-3 RNA binding family member B                                                              | miR-26a;<br>miR-484 |
| <i>MFAP2</i>   | microfibrillar-associated protein 2                                                            | mir-484             |
| <i>MFAP3</i>   | microfibrillar-associated protein 3                                                            | mir-484             |
| <i>MFAP3L</i>  | microfibrillar-associated protein 3-like                                                       | miR-26a             |
| <i>MFHAS1</i>  | malignant fibrous histiocyteoma amplified sequence 1                                           | miR-26a             |
| <i>MFN1</i>    | mitofusin 1                                                                                    | miR-26a;<br>miR-222 |
| <i>MFN2</i>    | mitofusin 2                                                                                    | mir-484             |
| <i>MFSD10</i>  | major facilitator superfamily domain containing 10                                             | mir-484             |
| <i>MFSD6</i>   | major facilitator superfamily domain containing 6                                              | miR-26a             |
| <i>MGAT4A</i>  | mannosyl (alpha-1,3-)-glycoprotein beta-1,4-N-acetyl-glucosaminyltransferase, isozyme A        | miR-26a             |
| <i>MGAT5</i>   | mannosyl (alpha-1,6-)-glycoprotein beta-1,6-N-acetyl-glucosaminyltransferase                   | mir-484             |
| <i>MGRN1</i>   | mahogunin ring finger 1, E3 ubiquitin protein ligase                                           | mir-484             |
| <i>MGST2</i>   | microsomal glutathione S-transferase 2                                                         | mir-484             |
| <i>MIA3</i>    | melanoma inhibitory activity family, member 3                                                  | miR-222             |
| <i>MIB1</i>    | mindbomb E3 ubiquitin protein ligase 1                                                         | miR-26a             |
| <i>MICAL3</i>  | microtubule associated monooxygenase, calponin and LIM domain containing 3                     | miR-26a             |
| <i>MICU3</i>   | mitochondrial calcium uptake family, member 3                                                  | mir-484             |
| <i>MID1</i>    | midline 1 (Opitz/BBB syndrome)                                                                 | miR-222             |
| <i>MIDN</i>    | midnolin                                                                                       | miR-222             |
| <i>MIER3</i>   | mesoderm induction early response 1, family member 3                                           | miR-26a;<br>miR-222 |
| <i>MINK1</i>   | misshapen-like kinase 1                                                                        | mir-484             |
| <i>MITF</i>    | microphthalmia-associated transcription factor                                                 | miR-26a             |
| <i>MKNK2</i>   | MAP kinase interacting serine/threonine kinase 2                                               | miR-26a             |
| <i>MLEC</i>    | malectin                                                                                       | miR-26a             |
| <i>MLLT3</i>   | myeloid/lymphoid or mixed-lineage leukemia (trithorax homolog, Drosophila); translocated to, 3 | miR-26a             |
| <i>MLLT6</i>   | myeloid/lymphoid or mixed-lineage leukemia (trithorax homolog, Drosophila); translocated to, 6 | miR-222;<br>miR-484 |
| <i>MLXIP</i>   | MLX interacting protein                                                                        | mir-484             |
| <i>MMP14</i>   | matrix metalloproteinase 14 (membrane-inserted)                                                | miR-26a             |
| <i>MMP16</i>   | matrix metalloproteinase 16 (membrane-inserted)                                                | miR-26a             |

|                |                                                                     |         |
|----------------|---------------------------------------------------------------------|---------|
| <i>MN1</i>     | meningioma (disrupted in balanced translocation) 1                  | mir-484 |
| <i>MNX1</i>    | motor neuron and pancreas homeobox 1                                | miR-26a |
| <i>MOB1A</i>   | MOB kinase activator 1A                                             | miR-26a |
| <i>MOB3C</i>   | MOB kinase activator 3C                                             | mir-484 |
| <i>MOGAT2</i>  | monoacylglycerol O-acyltransferase 2                                | mir-484 |
| <i>MON2</i>    | MON2 homolog (S. cerevisiae)                                        | miR-222 |
| <i>MPP6</i>    | membrane protein, palmitoylated 6 (MAGUK p55 subfamily member 6)    | miR-26a |
| <i>MPRIP</i>   | myosin phosphatase Rho interacting protein                          | miR-26a |
| <i>MRAS</i>    | muscle RAS oncogene homolog                                         | miR-26a |
| <i>MREG</i>    | melanoregulin                                                       | miR-26a |
| <i>MRPL27</i>  | mitochondrial ribosomal protein L27                                 | mir-484 |
| <i>MS4A6A</i>  | membrane-spanning 4-domains, subfamily A, member 6A                 | mir-484 |
| <i>MSANTD1</i> | Myb/SANT-like DNA-binding domain containing 1                       | miR-26a |
| <i>MSANTD3</i> | Myb/SANT-like DNA-binding domain containing 3                       | mir-484 |
| <i>MSI2</i>    | musashi RNA-binding protein 2                                       | mir-484 |
| <i>MSL1</i>    | male-specific lethal 1 homolog (Drosophila)                         | miR-222 |
| <i>MSL2</i>    | male-specific lethal 2 homolog (Drosophila)                         | miR-222 |
| <i>MST4</i>    | Serine/threonine-protein kinase MST4                                | miR-222 |
| <i>MTCH1</i>   | mitochondrial carrier 1                                             | mir-484 |
| <i>MTDH</i>    | metadherin                                                          | miR-26a |
| <i>MTG1</i>    | mitochondrial ribosome-associated GTPase 1                          | mir-484 |
| <i>MTMR11</i>  | myotubularin related protein 11                                     | mir-484 |
| <i>MTPN</i>    | myotrophin                                                          | miR-26a |
| <i>MTSS1L</i>  | metastasis suppressor 1-like                                        | mir-484 |
| <i>MTX2</i>    | metaxin 2                                                           | miR-26a |
| <i>MXI1</i>    | MAX interactor 1, dimerization protein                              | miR-26a |
| <i>MYCBP</i>   | MYC binding protein                                                 | miR-26a |
| <i>MYLIP</i>   | myosin regulatory light chain interacting protein                   | miR-222 |
| <i>MYO10</i>   | myosin X                                                            | miR-222 |
| <i>MYO1A</i>   | myosin IA                                                           | mir-484 |
| <i>MYO1D</i>   | myosin ID                                                           | mir-484 |
| <i>MYO9A</i>   | myosin IXA                                                          | miR-26a |
| <i>MYOM3</i>   | myomesin 3                                                          | mir-484 |
| <i>MYOZ3</i>   | myozenin 3                                                          | mir-484 |
| <i>MYPOP</i>   | Myb-related transcription factor, partner of profilin               | miR-26a |
| <i>MYT1L</i>   | myelin transcription factor 1-like                                  | miR-222 |
| <i>MZB1</i>    | marginal zone B and B1 cell-specific protein                        | mir-484 |
| <i>NAA15</i>   | N(alpha)-acetyltransferase 15, NatA auxiliary subunit               | miR-26a |
| <i>NAA25</i>   | N(alpha)-acetyltransferase 25, NatB auxiliary subunit               | miR-222 |
| <i>NAA40</i>   | N(alpha)-acetyltransferase 40, NatD catalytic subunit               | mir-484 |
| <i>NAB1</i>    | NGFI-A binding protein 1 (EGR1 binding protein 1)                   | miR-26a |
| <i>NABP1</i>   | nucleic acid binding protein 1                                      | miR-26a |
| <i>NACCC1</i>  | nucleus accumbens associated 1, BEN and BTB (POZ) domain containing | mir-484 |



|                 |                                                                                                     |                     |
|-----------------|-----------------------------------------------------------------------------------------------------|---------------------|
| <i>NACC2</i>    | NACC family member 2, BEN and BTB (POZ) domain containing                                           | miR-26a             |
| <i>NAGPA</i>    | N-acetylglucosamine-1-phosphodiester alpha-N-acetylglucosaminidase                                  | miR-26a             |
| <i>NAMPT</i>    | nicotinamide phosphoribosyltransferase                                                              | miR-26a             |
| <i>NANOS1</i>   | nanos homolog 1 (Drosophila)                                                                        | miR-222             |
| <i>NAP1L1</i>   | nucleosome assembly protein 1-like 1                                                                | miR-222             |
| <i>NAP1L5</i>   | nucleosome assembly protein 1-like 5                                                                | miR-26a;<br>miR-222 |
| <i>NAT9</i>     | N-acetyltransferase 9 (GCN5-related, putative)                                                      | mir-484             |
| <i>NCAM2</i>    | neural cell adhesion molecule 2                                                                     | miR-26a             |
| <i>NCEH1</i>    | neutral cholesterol ester hydrolase 1                                                               | miR-26a             |
| <i>NCS1</i>     | neuronal calcium sensor 1                                                                           | mir-484             |
| <i>NDFIP1</i>   | Nedd4 family interacting protein 1                                                                  | miR-222             |
| <i>NDFIP2</i>   | Nedd4 family interacting protein 2                                                                  | miR-26a             |
| <i>NEBL</i>     | nebulette                                                                                           | miR-26a             |
| <i>NEDD4L</i>   | neural precursor cell expressed, developmentally down-regulated 4-like, E3 ubiquitin protein ligase | mir-484             |
| <i>NEK10</i>    | NIMA-related kinase 10                                                                              | miR-26a             |
| <i>NEK6</i>     | NIMA-related kinase 6                                                                               | miR-26a             |
| <i>NETO1</i>    | neuropilin (NRP) and tolloid (TLL)-like 1                                                           | miR-26a             |
| <i>NFAT5</i>    | nuclear factor of activated T-cells 5, tonicity-responsive                                          | miR-222             |
| <i>NFATC2IP</i> | nuclear factor of activated T-cells, cytoplasmic, calcineurin-dependent 2 interacting protein       | mir-484             |
| <i>NFATC3</i>   | nuclear factor of activated T-cells, cytoplasmic, calcineurin-dependent 3                           | miR-222             |
| <i>NFATC4</i>   | nuclear factor of activated T-cells, cytoplasmic, calcineurin-dependent 4                           | mir-484             |
| <i>NFE2L3</i>   | nuclear factor, erythroid 2-like 3                                                                  | miR-26a             |
| <i>NFIB</i>     | nuclear factor I/B                                                                                  | mir-484             |
| <i>NHS</i>      | Nance-Horan syndrome (congenital cataracts and dental anomalies)                                    | miR-26a             |
| <i>NHSL1</i>    | NHS-like 1                                                                                          | miR-26a             |
| <i>NIPAL4</i>   | NIPA-like domain containing 4                                                                       | miR-222             |
| <i>NIPBL</i>    | Nipped-B homolog (Drosophila)                                                                       | miR-26a;<br>miR-222 |
| <i>NKRF</i>     | NFKB repressing factor                                                                              | miR-26a             |
| <i>NKX2-5</i>   | NK2 homeobox 5                                                                                      | miR-26a             |
| <i>NLK</i>      | nemo-like kinase                                                                                    | miR-26a;<br>miR-222 |
| <i>NMRK1</i>    | nicotinamide riboside kinase 1                                                                      | mir-484             |
| <i>NOL8</i>     | nucleolar protein 8                                                                                 | mir-484             |
| <i>NOS1AP</i>   | nitric oxide synthase 1 (neuronal) adaptor protein                                                  | mir-484             |
| <i>NOTCH2NL</i> | notch 2 N-terminal like                                                                             | mir-484             |
| <i>NOVA1</i>    | neuro-oncological ventral antigen 1                                                                 | miR-26a;<br>miR-222 |
| <i>NR0B2</i>    | nuclear receptor subfamily 0, group B, member 2                                                     | mir-484             |

|                 |                                                                                |                     |
|-----------------|--------------------------------------------------------------------------------|---------------------|
| <i>NR4A1</i>    | nuclear receptor subfamily 4, group A, member 1                                | miR-222             |
| <i>NR4A3</i>    | nuclear receptor subfamily 4, group A, member 3                                | mir-484             |
| <i>NRAS</i>     | neuroblastoma RAS viral (v-ras) oncogene homolog                               | miR-26a             |
| <i>NRG1</i>     | neuregulin 1                                                                   | miR-222             |
| <i>NRG2</i>     | neuregulin 2                                                                   | miR-26a             |
| <i>NRIP1</i>    | nuclear receptor interacting protein 1                                         | miR-26a             |
| <i>NRK</i>      | Nik related kinase                                                             | miR-222             |
| <i>NSG1</i>     | Neuron-specific protein family member 1                                        | mir-484             |
| <i>NSMCE4A</i>  | non-SMC element 4 homolog A ( <i>S. cerevisiae</i> )                           | miR-222             |
| <i>NSUN3</i>    | NOP2/Sun domain family, member 3                                               | miR-26a             |
| <i>NSUN4</i>    | NOP2/Sun domain family, member 4                                               | mir-484             |
| <i>NTF3</i>     | neurotrophin 3                                                                 | miR-222             |
| <i>NTPCR</i>    | nucleoside-triphosphatase, cancer-related                                      | mir-484             |
| <i>NTRK3</i>    | neurotrophic tyrosine kinase, receptor, type 3                                 | mir-484             |
| <i>NUDT3</i>    | nudix (nucleoside diphosphate linked moiety X)-type motif 3                    | mir-484             |
| <i>NUFIP2</i>   | nuclear fragile X mental retardation protein interacting protein 2             | miR-222             |
| <i>NUP153</i>   | nucleoporin 153kDa                                                             | miR-26a             |
| <i>NUP50</i>    | nucleoporin 50kDa                                                              | miR-26a             |
| <i>NUP98</i>    | nucleoporin 98kDa                                                              | mir-484             |
| <i>NUS1</i>     | nuclear undecaprenyl pyrophosphate synthase 1 homolog ( <i>S. cerevisiae</i> ) | miR-26a             |
| <i>NXN</i>      | nucleoredoxin                                                                  | mir-484             |
| <i>NXPH1</i>    | neurexophilin 1                                                                | miR-222             |
| <i>OAF</i>      | OAF homolog ( <i>Drosophila</i> )                                              | miR-26a;<br>miR-484 |
| <i>OARD1</i>    | O-acyl-ADP-ribose deacylase 1                                                  | mir-484             |
| <i>OBFC1</i>    | oligonucleotide/oligosaccharide-binding fold containing 1                      | miR-26a             |
| <i>OCLN</i>     | occludin                                                                       | miR-26a             |
| <i>OGG1</i>     | 8-oxoguanine DNA glycosylase                                                   | mir-484             |
| <i>ONECUT3</i>  | one cut homeobox 3                                                             | miR-26a             |
| <i>OPA3</i>     | optic atrophy 3 (autosomal recessive, with chorea and spastic paraplegia)      | mir-484             |
| <i>OS9</i>      | osteosarcoma amplified 9, endoplasmic reticulum lectin                         | mir-484             |
| <i>OSBPL11</i>  | oxysterol binding protein-like 11                                              | miR-26a             |
| <i>OSBPL2</i>   | oxysterol binding protein-like 2                                               | miR-26a             |
| <i>OSR1</i>     | odd-skipped related 1 ( <i>Drosophila</i> )                                    | mir-484             |
| <i>OTUD1</i>    | OTU domain containing 1                                                        | miR-26a             |
| <i>OTUD4</i>    | OTU domain containing 4                                                        | miR-26a             |
| <i>OXTR</i>     | oxytocin receptor                                                              | mir-484             |
| <i>P2RX6</i>    | purinergic receptor P2X, ligand-gated ion channel, 6                           | mir-484             |
| <i>P2RY2</i>    | purinergic receptor P2Y, G-protein coupled, 2                                  | mir-484             |
| <i>PAFAH1B1</i> | platelet-activating factor acetylhydrolase 1b, regulatory subunit 1 (45kDa)    | miR-222             |

|                 |                                                                            |                     |
|-----------------|----------------------------------------------------------------------------|---------------------|
| <i>PAFAH1B2</i> | platelet-activating factor acetylhydrolase 1b, catalytic subunit 2 (30kDa) | mir-484             |
| <i>PAIP1</i>    | poly(A) binding protein interacting protein 1                              | miR-222             |
| <i>PAIP2</i>    | poly(A) binding protein interacting protein 2                              | miR-222             |
| <i>PAK1</i>     | p21 protein (Cdc42/Rac)-activated kinase 1                                 | miR-222             |
| <i>PAK2</i>     | p21 protein (Cdc42/Rac)-activated kinase 2                                 | miR-26a             |
| <i>PALM</i>     | paralemmin                                                                 | mir-484             |
| <i>PALM2</i>    | paralemmin 2                                                               | mir-484             |
| <i>PALM3</i>    | paralemmin 3                                                               | miR-26a             |
| <i>PAN3</i>     | PAN3 poly(A) specific ribonuclease subunit homolog (S. cerevisiae)         | miR-26a             |
| <i>PAPD4</i>    | PAP associated domain containing 4                                         | miR-26a             |
| <i>PARP1</i>    | poly (ADP-ribose) polymerase 1                                             | mir-484             |
| <i>PARP11</i>   | poly (ADP-ribose) polymerase family, member 11                             | mir-484             |
| <i>PATL1</i>    | protein associated with topoisomerase II homolog 1 (yeast)                 | miR-26a             |
| <i>PATZ1</i>    | POZ (BTB) and AT hook containing zinc finger 1                             | miR-26a             |
| <i>PAWR</i>     | PRKC, apoptosis, WT1, regulator                                            | miR-26a             |
| <i>PAX5</i>     | paired box 5                                                               | miR-26a             |
| <i>PAX9</i>     | paired box 9                                                               | mir-484             |
| <i>PBX3</i>     | pre-B-cell leukemia homeobox 3                                             | miR-222             |
| <i>PCDH18</i>   | protocadherin 18                                                           | miR-26a             |
| <i>PCDH19</i>   | protocadherin 19                                                           | mir-484             |
| <i>PCDHA1</i>   | protocadherin alpha 1                                                      | miR-222             |
| <i>PCDHA10</i>  | protocadherin alpha 10                                                     | miR-222             |
| <i>PCDHA11</i>  | protocadherin alpha 11                                                     | miR-222             |
| <i>PCDHA12</i>  | protocadherin alpha 12                                                     | miR-222             |
| <i>PCDHA13</i>  | protocadherin alpha 13                                                     | miR-222             |
| <i>PCDHA2</i>   | protocadherin alpha 2                                                      | miR-222             |
| <i>PCDHA3</i>   | protocadherin alpha 3                                                      | miR-222             |
| <i>PCDHA4</i>   | protocadherin alpha 4                                                      | miR-222             |
| <i>PCDHA5</i>   | protocadherin alpha 5                                                      | miR-222             |
| <i>PCDHA6</i>   | protocadherin alpha 6                                                      | miR-222             |
| <i>PCDHA7</i>   | protocadherin alpha 7                                                      | miR-222             |
| <i>PCDHA8</i>   | protocadherin alpha 8                                                      | miR-222             |
| <i>PCDHA9</i>   | protocadherin alpha 9                                                      | miR-222             |
| <i>PCDHAC1</i>  | protocadherin alpha subfamily C, 1                                         | miR-222             |
| <i>PCDHAC2</i>  | protocadherin alpha subfamily C, 2                                         | miR-222             |
| <i>PCNX</i>     | pecanex homolog (Drosophila)                                               | miR-26a             |
| <i>PDAP1</i>    | PDGFA associated protein 1                                                 | mir-484             |
| <i>PDCD10</i>   | programmed cell death 10                                                   | miR-26a;<br>miR-222 |
| <i>PDCD6IP</i>  | programmed cell death 6 interacting protein                                | mir-484             |
| <i>PDE3A</i>    | phosphodiesterase 3A, cGMP-inhibited                                       | miR-222             |
| <i>PDE4B</i>    | phosphodiesterase 4B, cAMP-specific                                        | miR-26a             |
| <i>PDE4D</i>    | phosphodiesterase 4D, cAMP-specific                                        | miR-26a             |
| <i>PDE7A</i>    | phosphodiesterase 7A                                                       | miR-26a             |

|                |                                                                    |                     |
|----------------|--------------------------------------------------------------------|---------------------|
| <i>PDGFA</i>   | platelet-derived growth factor alpha polypeptide                   | miR-222             |
| <i>PDHX</i>    | pyruvate dehydrogenase complex, component X                        | miR-26a             |
| <i>PDK2</i>    | pyruvate dehydrogenase kinase, isozyme 2                           | mir-484             |
| <i>PDK3</i>    | pyruvate dehydrogenase kinase, isozyme 3                           | mir-484             |
| <i>PDS5A</i>   | PDS5, regulator of cohesion maintenance, homolog A (S. cerevisiae) | mir-484             |
| <i>PDX1</i>    | pancreatic and duodenal homeobox 1                                 | mir-484             |
| <i>PDXK</i>    | pyridoxal (pyridoxine, vitamin B6) kinase                          | mir-484             |
| <i>PDZRN4</i>  | PDZ domain containing ring finger 4                                | miR-222             |
| <i>PELI2</i>   | pellino E3 ubiquitin protein ligase family member 2                | miR-26a             |
| <i>PEX11B</i>  | peroxisomal biogenesis factor 11 beta                              | mir-484             |
| <i>PEX6</i>    | peroxisomal biogenesis factor 6                                    | mir-484             |
| <i>PEX7</i>    | peroxisomal biogenesis factor 7                                    | mir-484             |
| <i>PFDN4</i>   | prefoldin subunit 4                                                | miR-26a             |
| <i>PFKFB2</i>  | 6-phosphofructo-2-kinase/fructose-2,6-biphosphatase 2              | miR-26a;<br>miR-484 |
| <i>PFKFB3</i>  | 6-phosphofructo-2-kinase/fructose-2,6-biphosphatase 3              | miR-26a             |
| <i>PFKL</i>    | phosphofructokinase, liver                                         | mir-484             |
| <i>PGAP1</i>   | post-GPI attachment to proteins 1                                  | miR-222             |
| <i>PGBD5</i>   | piggyBac transposable element derived 5                            | miR-222             |
| <i>PGD</i>     | phosphogluconate dehydrogenase                                     | mir-484             |
| <i>PGF</i>     | placental growth factor                                            | mir-484             |
| <i>PGM2L1</i>  | phosphoglucomutase 2-like 1                                        | miR-26a             |
| <i>PGR</i>     | progesterone receptor                                              | miR-26a             |
| <i>PGRMC2</i>  | progesterone receptor membrane component 2                         | miR-26a             |
| <i>PHACTR1</i> | phosphatase and actin regulator 1                                  | mir-484             |
| <i>PHACTR4</i> | phosphatase and actin regulator 4                                  | miR-222             |
| <i>PHF12</i>   | PHD finger protein 12                                              | mir-484             |
| <i>PHF2</i>    | PHD finger protein 2                                               | miR-222             |
| <i>PHF20L1</i> | PHD finger protein 20-like 1                                       | miR-26a             |
| <i>PHF21A</i>  | PHD finger protein 21A                                             | miR-26a             |
| <i>PHF3</i>    | PHD finger protein 3                                               | miR-26a             |
| <i>PHF6</i>    | PHD finger protein 6                                               | miR-26a             |
| <i>PHLDB2</i>  | pleckstrin homology-like domain, family B, member 2                | miR-26a             |
| <i>PHOX2B</i>  | paired-like homeobox 2b                                            | mir-484             |
| <i>PHRF1</i>   | PHD and ring finger domains 1                                      | mir-484             |
| <i>PIANP</i>   | PILR alpha associated neural protein                               | mir-484             |
| <i>PIAS1</i>   | protein inhibitor of activated STAT, 1                             | miR-26a             |
| <i>PIEZO2</i>  | piezo-type mechanosensitive ion channel component 2                | miR-222             |
| <i>PIGG</i>    | phosphatidylinositol glycan anchor biosynthesis, class G           | miR-26a;<br>miR-484 |
| <i>PIGO</i>    | phosphatidylinositol glycan anchor biosynthesis, class O           | mir-484             |
| <i>PIGU</i>    | phosphatidylinositol glycan anchor biosynthesis, class U           | miR-26a             |

|                |                                                                                              |                     |
|----------------|----------------------------------------------------------------------------------------------|---------------------|
| <i>PIK3C2A</i> | phosphatidylinositol-4-phosphate 3-kinase, catalytic subunit type 2 alpha                    | miR-26a             |
| <i>PIK3CB</i>  | phosphatidylinositol-4,5-bisphosphate 3-kinase, catalytic subunit beta                       | miR-26a             |
| <i>PIK3CD</i>  | phosphatidylinositol-4,5-bisphosphate 3-kinase, catalytic subunit delta                      | mir-484             |
| <i>PIK3R1</i>  | phosphoinositide-3-kinase, regulatory subunit 1 (alpha)                                      | miR-222;<br>miR-484 |
| <i>PIK3R3</i>  | phosphoinositide-3-kinase, regulatory subunit 3 (gamma)                                      | miR-26a             |
| <i>PIKFYVE</i> | phosphoinositide kinase, FYVE finger containing                                              | mir-484             |
| <i>PIM3</i>    | pim-3 oncogene                                                                               | miR-26a             |
| <i>PIP5K1B</i> | phosphatidylinositol-4-phosphate 5-kinase, type I, beta                                      | mir-484             |
| <i>PITPNC1</i> | phosphatidylinositol transfer protein, cytoplasmic 1                                         | miR-26a             |
| <i>PITPNM2</i> | phosphatidylinositol transfer protein, membrane-associated 2                                 | miR-222             |
| <i>PKDCC</i>   | protein kinase domain containing, cytoplasmic                                                | miR-222             |
| <i>PKIA</i>    | protein kinase (cAMP-dependent, catalytic) inhibitor alpha                                   | miR-222;<br>miR-484 |
| <i>PLA2G4E</i> | phospholipase A2, group IVE                                                                  | mir-484             |
| <i>PLCB1</i>   | phospholipase C, beta 1 (phosphoinositide-specific)                                          | miR-26a             |
| <i>PLCB2</i>   | phospholipase C, beta 2                                                                      | mir-484             |
| <i>PLCB3</i>   | phospholipase C, beta 3 (phosphatidylinositol-specific)                                      | mir-484             |
| <i>PLCD3</i>   | phospholipase C, delta 3                                                                     | mir-484             |
| <i>PLEKHA2</i> | pleckstrin homology domain containing, family A (phosphoinositide binding specific) member 2 | miR-222             |
| <i>PLEKHB2</i> | pleckstrin homology domain containing, family B (evectins) member 2                          | mir-484             |
| <i>PLEKHH1</i> | pleckstrin homology domain containing, family H (with MyTH4 domain) member 1                 | miR-26a             |
| <i>PLOD2</i>   | procollagen-lysine, 2-oxoglutarate 5-dioxygenase 2                                           | miR-26a             |
| <i>PLXNA2</i>  | plexin A2                                                                                    | miR-26a             |
| <i>PLXNC1</i>  | plexin C1                                                                                    | miR-222             |
| <i>PMEPA1</i>  | prostate transmembrane protein, androgen induced 1                                           | miR-26a             |
| <i>PNO1</i>    | partner of NOB1 homolog (S. cerevisiae)                                                      | mir-484             |
| <i>PNPLA3</i>  | patatin-like phospholipase domain containing 3                                               | mir-484             |
| <i>PNRC1</i>   | proline-rich nuclear receptor coactivator 1                                                  | miR-26a             |
| <i>PODNL1</i>  | podocan-like 1                                                                               | mir-484             |
| <i>POGZ</i>    | pogo transposable element with ZNF domain                                                    | miR-222             |
| <i>POM121C</i> | POM121 transmembrane nucleoporin C                                                           | miR-26a             |
| <i>POMGNT1</i> | protein O-linked mannose N-acetylglucosaminyltransferase 1 (beta 1,2-)                       | mir-484             |
| <i>POP4</i>    | processing of precursor 4, ribonuclease P/MRP subunit (S. cerevisiae)                        | mir-484             |
| <i>POU4F1</i>  | POU class 4 homeobox 1                                                                       | miR-26a             |
| <i>POU6F2</i>  | POU class 6 homeobox 2                                                                       | mir-484             |

|                 |                                                                       |                     |
|-----------------|-----------------------------------------------------------------------|---------------------|
| <i>PPARGC1B</i> | peroxisome proliferator-activated receptor gamma, co-activator 1 beta | miR-26a             |
| <i>PPEF1</i>    | protein phosphatase, EF-hand calcium binding domain 1                 | mir-484             |
| <i>PPIG</i>     | peptidylprolyl isomerase G (cyclophilin G)                            | miR-26a             |
| <i>PPP1R15B</i> | protein phosphatase 1, regulatory subunit 15B                         | miR-26a;<br>miR-222 |
| <i>PPP2R2A</i>  | protein phosphatase 2, regulatory subunit B, alpha                    | miR-222             |
| <i>PPP3CB</i>   | protein phosphatase 3, catalytic subunit, beta isozyme                | miR-26a             |
| <i>PPP3R1</i>   | protein phosphatase 3, regulatory subunit B, alpha                    | miR-26a;<br>miR-222 |
| <i>PPP4R1</i>   | protein phosphatase 4, regulatory subunit 1                           | miR-26a             |
| <i>PPP6C</i>    | protein phosphatase 6, catalytic subunit                              | miR-26a;<br>miR-222 |
| <i>PRDM11</i>   | PR domain containing 11                                               | mir-484             |
| <i>PRDM2</i>    | PR domain containing 2, with ZNF domain                               | mir-484             |
| <i>PRELP</i>    | proline/arginine-rich end leucine-rich repeat protein                 | miR-26a             |
| <i>PRKAA2</i>   | protein kinase, AMP-activated, alpha 2 catalytic subunit              | miR-26a             |
| <i>PRKACB</i>   | protein kinase, cAMP-dependent, catalytic, beta                       | miR-222             |
| <i>PRKAG2</i>   | protein kinase, AMP-activated, gamma 2 non-catalytic subunit          | miR-26a             |
| <i>PRKAG3</i>   | protein kinase, AMP-activated, gamma 3 non-catalytic subunit          | mir-484             |
| <i>PRKCD</i>    | protein kinase C, delta                                               | miR-26a             |
| <i>PRKCQ</i>    | protein kinase C, theta                                               | miR-26a             |
| <i>PRKG1</i>    | protein kinase, cGMP-dependent, type I                                | miR-26a             |
| <i>PRM1</i>     | protamine 1                                                           | mir-484             |
| <i>PROM2</i>    | prominin 2                                                            | mir-484             |
| <i>PRR14L</i>   | proline rich 14-like                                                  | miR-222             |
| <i>PRR5L</i>    | proline rich 5 like                                                   | miR-26a             |
| <i>PRRC2B</i>   | proline-rich coiled-coil 2B                                           | mir-484             |
| <i>PRRG3</i>    | proline rich Gla (G-carboxyglutamic acid) 3 (trans-membrane)          | miR-222             |
| <i>PRUNE</i>    | prune exopolyphosphatase                                              | miR-222             |
| <i>PSD3</i>     | pleckstrin and Sec7 domain containing 3                               | miR-26a             |
| <i>PSMB5</i>    | proteasome (prosome, macropain) subunit, beta type, 5                 | miR-222             |
| <i>PSMC6</i>    | proteasome (prosome, macropain) 26S subunit, ATPase, 6                | mir-484             |
| <i>PSMF1</i>    | proteasome (prosome, macropain) inhibitor subunit 1 (PI31)            | mir-484             |
| <i>PTBP2</i>    | polypyrimidine tract binding protein 2                                | miR-222             |
| <i>PTBP3</i>    | polypyrimidine tract binding protein 3                                | miR-222             |
| <i>PTCHD1</i>   | patched domain containing 1                                           | miR-26a;<br>miR-222 |
| <i>PTEN</i>     | phosphatase and tensin homolog                                        | miR-26a             |
| <i>PTGIS</i>    | prostaglandin I2 (prostacyclin) synthase                              | mir-484             |

|                  |                                                                                              |                     |
|------------------|----------------------------------------------------------------------------------------------|---------------------|
| <i>PTGS2</i>     | prostaglandin-endoperoxide synthase 2 (prostaglandin G/H synthase and cyclooxygenase)        | miR-26a             |
| <i>PTK7</i>      | protein tyrosine kinase 7                                                                    | mir-484             |
| <i>PTP4A1</i>    | protein tyrosine phosphatase type IVA, member 1                                              | miR-26a             |
| <i>PTPLA</i>     | protein tyrosine phosphatase-like (proline instead of catalytic arginine), member A          | miR-26a             |
| <i>PTPN13</i>    | protein tyrosine phosphatase, non-receptor type 13 (APO-1/CD95 (Fas)-associated phosphatase) | miR-26a             |
| <i>PTPN3</i>     | protein tyrosine phosphatase, non-receptor type 3                                            | miR-26a             |
| <i>PTPRD</i>     | protein tyrosine phosphatase, receptor type, D                                               | miR-26a             |
| <i>PTS</i>       | 6-pyruvoyltetrahydropterin synthase                                                          | miR-222             |
| <i>PURA</i>      | purine-rich element binding protein A                                                        | miR-26a;<br>miR-222 |
| <i>PVRL1</i>     | poliovirus receptor-related 1 (herpesvirus entry mediator C)                                 | miR-222             |
| <i>PWWP2A</i>    | PWWP domain containing 2A                                                                    | miR-26a             |
| <i>PYGO2</i>     | pygopus homolog 2 (Drosophila)                                                               | mir-484             |
| <i>QKI</i>       | QKI, KH domain containing, RNA binding                                                       | miR-222             |
| <i>R3HCC1L</i>   | R3H domain and coiled-coil containing 1-like                                                 | mir-484             |
| <i>RAB11A</i>    | RAB11A, member RAS oncogene family                                                           | miR-26a             |
| <i>RAB11FIP1</i> | RAB11 family interacting protein 1 (class I)                                                 | miR-26a;<br>miR-484 |
| <i>RAB11FIP4</i> | RAB11 family interacting protein 4 (class II)                                                | mir-484             |
| <i>RAB11FIP5</i> | RAB11 family interacting protein 5 (class I)                                                 | mir-484             |
| <i>RAB1A</i>     | RAB1A, member RAS oncogene family                                                            | miR-222             |
| <i>RAB31</i>     | RAB31, member RAS oncogene family                                                            | mir-484             |
| <i>RAB37</i>     | RAB37, member RAS oncogene family                                                            | mir-484             |
| <i>RAB3B</i>     | RAB3B, member RAS oncogene family                                                            | miR-222             |
| <i>RAB3GAP2</i>  | RAB3 GTPase activating protein subunit 2 (non-catalytic)                                     | miR-222             |
| <i>RAB43</i>     | RAB43, member RAS oncogene family                                                            | mir-484             |
| <i>RABIF</i>     | RAB interacting factor                                                                       | mir-484             |
| <i>RALGAP1</i>   | Ral GTPase activating protein, alpha subunit 1 (catalytic)                                   | miR-222             |
| <i>RANBP10</i>   | RAN binding protein 10                                                                       | miR-26a             |
| <i>RANBP2</i>    | RAN binding protein 2                                                                        | miR-222             |
| <i>RANBP9</i>    | RAN binding protein 9                                                                        | miR-26a             |
| <i>RAP1A</i>     | RAP1A, member of RAS oncogene family                                                         | miR-26a;<br>miR-484 |
| <i>RAP1B</i>     | RAP1B, member of RAS oncogene family                                                         | miR-26a             |
| <i>RAP2C</i>     | RAP2C, member of RAS oncogene family                                                         | miR-26a             |
| <i>RASA4</i>     | RAS p21 protein activator 4                                                                  | mir-484             |
| <i>RASAL2</i>    | RAS protein activator like 2                                                                 | miR-26a             |
| <i>RASSF3</i>    | Ras association (RalGDS/AF-6) domain family member 3                                         | miR-26a             |
| <i>RASSF5</i>    | Ras association (RalGDS/AF-6) domain family member 5                                         | mir-484             |
| <i>RB1</i>       | retinoblastoma 1                                                                             | miR-26a             |

|               |                                                                                       |                                 |
|---------------|---------------------------------------------------------------------------------------|---------------------------------|
| <i>RB1CC1</i> | RB1-inducible coiled-coil 1                                                           | mir-484                         |
| <i>RBM17</i>  | RNA binding motif protein 17                                                          | mir-484                         |
| <i>RBM24</i>  | RNA binding motif protein 24                                                          | miR-26a;<br>miR-222             |
| <i>RBM47</i>  | RNA binding motif protein 47                                                          | miR-26a                         |
| <i>RBMS1</i>  | RNA binding motif, single stranded interacting protein 1                              | miR-26a                         |
| <i>RBP4</i>   | retinol binding protein 4, plasma                                                     | mir-484                         |
| <i>RCBTB1</i> | regulator of chromosome condensation (RCC1) and BTB (POZ) domain containing protein 1 | miR-26a                         |
| <i>RCN1</i>   | reticulocalbin 1, EF-hand calcium binding domain                                      | miR-26a                         |
| <i>RCN2</i>   | reticulocalbin 2, EF-hand calcium binding domain                                      | miR-26a                         |
| <i>RCOR1</i>  | REST corepressor 1                                                                    | miR-26a                         |
| <i>RDH14</i>  | retinol dehydrogenase 14 (all-trans/9-cis/11-cis)                                     | miR-26a                         |
| <i>REEP3</i>  | receptor accessory protein 3                                                          | miR-26a                         |
| <i>REEP4</i>  | receptor accessory protein 4                                                          | miR-26a                         |
| <i>RERE</i>   | arginine-glutamic acid dipeptide (RE) repeats                                         | miR-26a                         |
| <i>REST</i>   | RE1-silencing transcription factor                                                    | miR-26a                         |
| <i>REV1</i>   | REV1, polymerase (DNA directed)                                                       | miR-222                         |
| <i>REV3L</i>  | REV3-like, polymerase (DNA directed), zeta, catalytic subunit                         | miR-222                         |
| <i>RFX3</i>   | regulatory factor X, 3 (influences HLA class II expression)                           | miR-26a;<br>miR-222;<br>miR-484 |
| <i>RFX7</i>   | regulatory factor X, 7                                                                | miR-26a;<br>miR-222             |
| <i>RGS17</i>  | regulator of G-protein signaling 17                                                   | miR-26a;<br>miR-222;<br>miR-484 |
| <i>RGS4</i>   | regulator of G-protein signaling 4                                                    | miR-26a                         |
| <i>RGS9BP</i> | regulator of G protein signaling 9 binding protein                                    | mir-484                         |
| <i>RHOQ</i>   | ras homolog family member Q                                                           | miR-26a;<br>miR-484             |
| <i>RHPN2</i>  | rhophilin, Rho GTPase binding protein 2                                               | mir-484                         |
| <i>RIMKLA</i> | ribosomal modification protein rimK-like family member A                              | miR-26a                         |
| <i>RIMS3</i>  | regulating synaptic membrane exocytosis 3                                             | miR-222;<br>miR-484             |
| <i>RIOK3</i>  | RIO kinase 3                                                                          | mir-484                         |
| <i>RLF</i>    | rearranged L-myc fusion                                                               | miR-26a                         |
| <i>RLIM</i>   | ring finger protein, LIM domain interacting                                           | mir-484                         |
| <i>RNF150</i> | ring finger protein 150                                                               | miR-26a                         |
| <i>RNF213</i> | ring finger protein 213                                                               | miR-26a                         |
| <i>RNF214</i> | ring finger protein 214                                                               | mir-484                         |
| <i>RNF215</i> | ring finger protein 215                                                               | miR-26a                         |
| <i>RNF24</i>  | ring finger protein 24                                                                | mir-484                         |
| <i>RNF4</i>   | ring finger protein 4                                                                 | miR-222                         |
| <i>RNF44</i>  | ring finger protein 44                                                                | miR-222                         |



|                |                                                                            |                     |
|----------------|----------------------------------------------------------------------------|---------------------|
| <i>RNF6</i>    | ring finger protein (C3H2C3 type) 6                                        | miR-26a             |
| <i>RNFT2</i>   | ring finger protein, transmembrane 2                                       | mir-484             |
| <i>RNPS1</i>   | RNA binding protein S1, serine-rich domain                                 | miR-222             |
| <i>ROCK1</i>   | Rho-associated, coiled-coil containing protein kinase 1                    | miR-26a             |
| <i>RPGR</i>    | retinitis pigmentosa GTPase regulator                                      | miR-26a             |
| <i>RPRD2</i>   | regulation of nuclear pre-mRNA domain containing 2                         | miR-26a             |
| <i>RPRM</i>    | reprimo, TP53 dependent G2 arrest mediator candidate                       | mir-484             |
| <i>RPS6KA1</i> | ribosomal protein S6 kinase, 90kDa, polypeptide 1                          | mir-484             |
| <i>RPS6KA2</i> | ribosomal protein S6 kinase, 90kDa, polypeptide 2                          | miR-26a             |
| <i>RPS6KA6</i> | ribosomal protein S6 kinase, 90kDa, polypeptide 6                          | miR-26a             |
| <i>RRAGD</i>   | Ras-related GTP binding D                                                  | mir-484             |
| <i>RREB1</i>   | ras responsive element binding protein 1                                   | miR-222             |
| <i>RSBN1L</i>  | round spermatid basic protein 1-like                                       | miR-222             |
| <i>RSPH9</i>   | radial spoke head 9 homolog (Chlamydomonas)                                | mir-484             |
| <i>RSPRY1</i>  | ring finger and SPRY domain containing 1                                   | miR-26a             |
| <i>RTF1</i>    | Rtf1, Paf1/RNA polymerase II complex component, homolog (S. cerevisiae)    | miR-26a             |
| <i>RTN1</i>    | reticulon 1                                                                | miR-26a             |
| <i>RUFY4</i>   | RUN and FYVE domain containing 4                                           | mir-484             |
| <i>RUNX1T1</i> | runt-related transcription factor 1; translocated to, 1 (cyclin D-related) | miR-222             |
| <i>RUNX2</i>   | runt-related transcription factor 2                                        | miR-222             |
| <i>RWDD4</i>   | RWD domain containing 4                                                    | miR-26a             |
| <i>RYK</i>     | receptor-like tyrosine kinase                                              | miR-26a             |
| <i>SACS</i>    | spastic ataxia of Charlevoix-Saguenay (sacsin)                             | miR-26a             |
| <i>SALL1</i>   | sal-like 1 (Drosophila)                                                    | miR-26a             |
| <i>SAMD12</i>  | sterile alpha motif domain containing 12                                   | miR-26a             |
| <i>SAMD8</i>   | sterile alpha motif domain containing 8                                    | miR-26a             |
| <i>SAP30L</i>  | SAP30-like                                                                 | mir-484             |
| <i>SAR1B</i>   | SAR1 homolog B (S. cerevisiae)                                             | miR-26a             |
| <i>SBK1</i>    | SH3 domain binding kinase 1                                                | miR-222;<br>miR-484 |
| <i>SBNO1</i>   | strawberry notch homolog 1 (Drosophila)                                    | miR-26a             |
| <i>SCAI</i>    | suppressor of cancer cell invasion                                         | miR-26a             |
| <i>SCARA3</i>  | scavenger receptor class A, member 3                                       | mir-484             |
| <i>SCARB2</i>  | scavenger receptor class B, member 2                                       | mir-484             |
| <i>SCD5</i>    | stearoyl-CoA desaturase 5                                                  | miR-222             |
| <i>SCML4</i>   | sex comb on midleg-like 4 (Drosophila)                                     | miR-26a             |
| <i>SCN2B</i>   | sodium channel, voltage-gated, type II, beta subunit                       | mir-484             |
| <i>SCN5A</i>   | sodium channel, voltage-gated, type V, alpha subunit                       | miR-26a             |
| <i>SCOC</i>    | short coiled-coil protein                                                  | miR-26a             |
| <i>SCRIB</i>   | scribbled planar cell polarity protein                                     | mir-484             |
| <i>SCRT2</i>   | scratch homolog 2, zinc finger protein (Drosophila)                        | mir-484             |
| <i>SCT</i>     | secretin                                                                   | mir-484             |
| <i>SCUBE3</i>  | signal peptide, CUB domain, EGF-like 3                                     | mir-484             |
| <i>SDC1</i>    | syndecan 1                                                                 | mir-484             |

|                 |                                                                                                                  |                     |
|-----------------|------------------------------------------------------------------------------------------------------------------|---------------------|
| <i>SEC16B</i>   | SEC16 homolog B ( <i>S. cerevisiae</i> )                                                                         | mir-484             |
| <i>SEC24A</i>   | SEC24 family, member A ( <i>S. cerevisiae</i> )                                                                  | miR-26a             |
| <i>SEC61A1</i>  | Sec61 alpha 1 subunit ( <i>S. cerevisiae</i> )                                                                   | mir-484             |
| <i>SEC62</i>    | SEC62 homolog ( <i>S. cerevisiae</i> )                                                                           | miR-222             |
| <i>SEMA4D</i>   | sema domain, immunoglobulin domain (Ig), transmembrane domain (TM) and short cytoplasmic domain, (semaphorin) 4D | mir-484             |
| <i>SEMA6D</i>   | sema domain, transmembrane domain (TM), and cytoplasmic domain, (semaphorin) 6D                                  | miR-26a;<br>miR-222 |
| <i>SEN5P</i>    | SUMO1/sentrin specific peptidase 5                                                                               | miR-26a             |
| <i>SEN6P</i>    | SUMO1/sentrin specific peptidase 6                                                                               | mir-484             |
| <i>SERBP1</i>   | SERPINE1 mRNA binding protein 1                                                                                  | miR-26a             |
| <i>SERP1</i>    | stress-associated endoplasmic reticulum protein 1                                                                | miR-26a             |
| <i>SERPINA3</i> | serpin peptidase inhibitor, clade A (alpha-1 antiprotease, antitrypsin), member 3                                | mir-484             |
| <i>SESN3</i>    | sestrin 3                                                                                                        | miR-26a;<br>miR-222 |
| <i>SESTD1</i>   | SEC14 and spectrin domains 1                                                                                     | miR-26a;<br>miR-484 |
| <i>SETD8</i>    | SET domain containing (lysine methyltransferase) 8                                                               | miR-26a             |
| <i>SFMBT2</i>   | Scm-like with four mbt domains 2                                                                                 | miR-26a             |
| <i>SFRP5</i>    | secreted frizzled-related protein 5                                                                              | mir-484             |
| <i>SFT2D2</i>   | SFT2 domain containing 2                                                                                         | mir-484             |
| <i>SFXN1</i>    | sideroflexin 1                                                                                                   | mir-484             |
| <i>SH3BP4</i>   | SH3-domain binding protein 4                                                                                     | miR-222             |
| <i>SH3D19</i>   | SH3 domain containing 19                                                                                         | miR-26a             |
| <i>SH3PXD2A</i> | SH3 and PX domains 2A                                                                                            | miR-26a             |
| <i>SH3RF1</i>   | SH3 domain containing ring finger 1                                                                              | miR-26a             |
| <i>SH3RF3</i>   | SH3 domain containing ring finger 3                                                                              | mir-484             |
| <i>SHANK2</i>   | SH3 and multiple ankyrin repeat domains 2                                                                        | miR-222             |
| <i>SHC1</i>     | SHC (Src homology 2 domain containing) transforming protein 1                                                    | mir-484             |
| <i>SHC4</i>     | SHC (Src homology 2 domain containing) family, member 4                                                          | miR-26a             |
| <i>SHH</i>      | sonic hedgehog                                                                                                   | mir-484             |
| <i>SHISA4</i>   | shisa family member 4                                                                                            | mir-484             |
| <i>SHISA5</i>   | shisa family member 5                                                                                            | mir-484             |
| <i>SHPK</i>     | transient receptor potential cation channel subfamily V member 1                                                 | mir-484             |
| <i>SIAH3</i>    | siah E3 ubiquitin protein ligase family member 3                                                                 | mir-484             |
| <i>SIGMAR1</i>  | sigma non-opioid intracellular receptor 1                                                                        | mir-484             |
| <i>SKAP2</i>    | src kinase associated phosphoprotein 2                                                                           | mir-484             |
| <i>SKP2</i>     | S-phase kinase-associated protein 2, E3 ubiquitin protein ligase                                                 | miR-26a             |
| <i>SLC10A4</i>  | solute carrier family 10, member 4                                                                               | miR-26a             |
| <i>SLC11A1</i>  | solute carrier family 11 (proton-coupled divalent metal ion transporter), member 1                               | mir-484             |

|                 |                                                                                                         |                                 |
|-----------------|---------------------------------------------------------------------------------------------------------|---------------------------------|
| <i>SLC12A2</i>  | solute carrier family 12 (sodium/potassium/chloride transporter), member 2                              | miR-26a                         |
| <i>SLC16A6</i>  | solute carrier family 16, member 6                                                                      | miR-26a                         |
| <i>SLC17A9</i>  | solute carrier family 17 (vesicular nucleotide transporter), member 9                                   | mir-484                         |
| <i>SLC19A1</i>  | solute carrier family 19 (folate transporter), member 1                                                 | mir-484                         |
| <i>SLC19A2</i>  | solute carrier family 19 (thiamine transporter), member 2                                               | miR-26a                         |
| <i>SLC1A1</i>   | solute carrier family 1 (neuronal/epithelial high affinity glutamate transporter, system Xag), member 1 | miR-26a                         |
| <i>SLC22A23</i> | solute carrier family 22, member 23                                                                     | miR-26a                         |
| <i>SLC24A4</i>  | solute carrier family 24 (sodium/potassium/calcium exchanger), member 4                                 | miR-26a                         |
| <i>SLC25A16</i> | solute carrier family 25 (mitochondrial carrier; Graves disease autoantigen), member 16                 | miR-26a                         |
| <i>SLC25A19</i> | solute carrier family 25 (mitochondrial thiamine pyrophosphate carrier), member 19                      | mir-484                         |
| <i>SLC25A20</i> | solute carrier family 25 (carnitine/acylcarnitine translocase), member 20                               | miR-26a                         |
| <i>SLC25A37</i> | solute carrier family 25 (mitochondrial iron transporter), member 37                                    | miR-26a;<br>miR-222             |
| <i>SLC26A4</i>  | solute carrier family 26 (anion exchanger), member 4                                                    | miR-26a                         |
| <i>SLC2A13</i>  | solute carrier family 2 (facilitated glucose transporter), member 13                                    | miR-26a                         |
| <i>SLC2A5</i>   | solute carrier family 2 (facilitated glucose/fructose transporter), member 5                            | mir-484                         |
| <i>SLC30A6</i>  | solute carrier family 30 (zinc transporter), member 6                                                   | mir-484                         |
| <i>SLC34A2</i>  | solute carrier family 34 (type II sodium/phosphate cotransporter), member 2                             | mir-484                         |
| <i>SLC35B3</i>  | solute carrier family 35 (adenosine 3'-phospho 5'-phosphosulfate transporter), member B3                | mir-484                         |
| <i>SLC35C2</i>  | solute carrier family 35 (GDP-fucose transporter), member C2                                            | mir-484                         |
| <i>SLC35E2</i>  | solute carrier family 35, member E2                                                                     | miR-26a                         |
| <i>SLC35E2B</i> | solute carrier family 35, member E2B                                                                    | miR-26a                         |
| <i>SLC35F2</i>  | solute carrier family 35, member F2                                                                     | mir-484                         |
| <i>SLC35G1</i>  | solute carrier family 35, member G1                                                                     | miR-26a                         |
|                 |                                                                                                         | miR-26a;<br>miR-222;<br>miR-484 |
| <i>SLC38A1</i>  | solute carrier family 38, member 1                                                                      |                                 |
| <i>SLC38A2</i>  | solute carrier family 38, member 2                                                                      | miR-26a                         |
| <i>SLC41A3</i>  | solute carrier family 41, member 3                                                                      | mir-484                         |
|                 |                                                                                                         | miR-26a;<br>miR-484             |
| <i>SLC45A4</i>  | solute carrier family 45, member 4                                                                      |                                 |
| <i>SLC46A1</i>  | solute carrier family 46 (folate transporter), member 1                                                 | mir-484                         |
| <i>SLC4A4</i>   | solute carrier family 4 (sodium bicarbonate cotransporter), member 4                                    | miR-26a;<br>miR-222             |
| <i>SLC5A10</i>  | solute carrier family 5 (sodium/sugar cotransporter), member 10                                         | mir-484                         |

|                |                                                                                                   |                     |
|----------------|---------------------------------------------------------------------------------------------------|---------------------|
| <i>SLC6A1</i>  | solute carrier family 6 (neurotransmitter transporter), member 1                                  | miR-222             |
| <i>SLC6A15</i> | solute carrier family 6 (neutral amino acid transporter), member 15                               | miR-26a             |
| <i>SLC6A6</i>  | solute carrier family 6 (neurotransmitter transporter), member 6                                  | miR-26a             |
| <i>SLC7A11</i> | solute carrier family 7 (anionic amino acid transporter light chain, xc- system), member 11       | miR-26a             |
| <i>SLC9A2</i>  | solute carrier family 9, subfamily A (NHE2, cation proton antiporter 2), member 2                 | miR-26a             |
| <i>SLCO1A2</i> | solute carrier organic anion transporter family, member 1A2                                       | miR-222             |
| <i>SLCO5A1</i> | solute carrier organic anion transporter family, member 5A1                                       | miR-26a             |
| <i>SLFN12</i>  | schlafen family member 12                                                                         | mir-484             |
| <i>SLITRK5</i> | SLIT and NTRK-like family, member 5                                                               | miR-222             |
| <i>SLK</i>     | STE20-like kinase                                                                                 | mir-484             |
| <i>SMAD1</i>   | SMAD family member 1                                                                              | miR-26a             |
| <i>SMARCA5</i> | SWI/SNF related, matrix associated, actin dependent regulator of chromatin, subfamily a, member 5 | miR-222             |
| <i>SMARCE1</i> | SWI/SNF related, matrix associated, actin dependent regulator of chromatin, subfamily e, member 1 | mir-484             |
| <i>SMG6</i>    | SMG6 nonsense mediated mRNA decay factor                                                          | mir-484             |
| <i>SMIM12</i>  | small integral membrane protein 12                                                                | mir-484             |
| <i>SMNDC1</i>  | survival motor neuron domain containing 1                                                         | miR-26a;<br>miR-222 |
| <i>SNAP29</i>  | synaptosomal-associated protein, 29kDa                                                            | miR-222             |
| <i>SNCB</i>    | synuclein, beta                                                                                   | miR-222             |
| <i>SNN</i>     | stannin                                                                                           | miR-26a             |
| <i>SNX2</i>    | sorting nexin 2                                                                                   | mir-484             |
| <i>SNX21</i>   | sorting nexin family member 21                                                                    | mir-484             |
| <i>SNX30</i>   | sorting nexin family member 30                                                                    | miR-26a             |
| <i>SNX33</i>   | sorting nexin 33                                                                                  | mir-484             |
| <i>SOCS1</i>   | suppressor of cytokine signaling 1                                                                | miR-222             |
| <i>SOCS5</i>   | suppressor of cytokine signaling 5                                                                | miR-26a             |
| <i>SOCS6</i>   | suppressor of cytokine signaling 6                                                                | miR-26a             |
| <i>SOCS7</i>   | suppressor of cytokine signaling 7                                                                | miR-26a;<br>miR-222 |
| <i>SOGA3</i>   | SOGA family member 3                                                                              | miR-26a             |
| <i>SOSTDC1</i> | sclerostin domain containing 1                                                                    | miR-26a             |
| <i>SOX1</i>    | SRY (sex determining region Y)-box 1                                                              | miR-222             |
| <i>SOX17</i>   | SRY (sex determining region Y)-box 17                                                             | miR-26a             |
| <i>SOX5</i>    | SRY (sex determining region Y)-box 5                                                              | miR-26a             |
| <i>SPATS2</i>  | spermatogenesis associated, serine-rich 2                                                         | mir-484             |
| <i>SPATS2L</i> | spermatogenesis associated, serine-rich 2-like                                                    | miR-222             |
| <i>SPIN1</i>   | spindlin 1                                                                                        | mir-484             |
| <i>SPOCD1</i>  | SPOC domain containing 1                                                                          | mir-484             |

|                |                                                                          |                                 |
|----------------|--------------------------------------------------------------------------|---------------------------------|
| <i>SPOCK2</i>  | sparc/osteonectin, cwcv and kazal-like domains proteoglycan (testican) 2 | miR-26a                         |
| <i>SPPL3</i>   | signal peptide peptidase like 3                                          | miR-222                         |
| <i>SPRED1</i>  | sprouty-related, EVH1 domain containing 1                                | miR-222                         |
| <i>SPRED2</i>  | sprouty-related, EVH1 domain containing 2                                | miR-222                         |
| <i>SPTSSA</i>  | serine palmitoyltransferase, small subunit A                             | miR-222                         |
| <i>SRCAP</i>   | Snf2-related CREBBP activator protein                                    | miR-26a                         |
| <i>SRGAP1</i>  | SLIT-ROBO Rho GTPase activating protein 1                                | miR-26a;<br>miR-484             |
| <i>SRGAP2</i>  | SLIT-ROBO Rho GTPase activating protein 2                                | mir-484                         |
| <i>SRP19</i>   | signal recognition particle 19kDa                                        | miR-26a                         |
| <i>SRSF10</i>  | serine/arginine-rich splicing factor 10                                  | miR-26a                         |
| <i>SRSF2</i>   | serine/arginine-rich splicing factor 2                                   | miR-222                         |
| <i>SRSF4</i>   | serine/arginine-rich splicing factor 4                                   | mir-484                         |
| <i>SRSF7</i>   | serine/arginine-rich splicing factor 7                                   | miR-222                         |
| <i>SSFA2</i>   | sperm specific antigen 2                                                 | miR-26a                         |
| <i>SSX2IP</i>  | synovial sarcoma, X breakpoint 2 interacting protein                     | miR-26a                         |
| <i>ST3GAL6</i> | ST3 beta-galactoside alpha-2,3-sialyltransferase 6                       | miR-26a                         |
| <i>ST6GAL2</i> | ST6 beta-galactosamide alpha-2,6-sialyltransferase 2                     | miR-26a                         |
| <i>ST8SIA1</i> | ST8 alpha-N-acetyl-neuraminide alpha-2,8-sialyltransferase 1             | miR-222;<br>miR-484             |
| <i>ST8SIA4</i> | ST8 alpha-N-acetyl-neuraminide alpha-2,8-sialyltransferase 4             | miR-26a                         |
| <i>STAC2</i>   | SH3 and cysteine rich domain 2                                           | miR-26a                         |
| <i>STARD13</i> | StAR-related lipid transfer (START) domain containing 13                 | mir-484                         |
| <i>STEAP2</i>  | STEAP family member 2, metalloredutase                                   | mir-484                         |
| <i>STEAP3</i>  | STEAP family member 3, metalloredutase                                   | mir-484                         |
| <i>STK11</i>   | serine/threonine kinase 11                                               | miR-26a                         |
| <i>STK39</i>   | serine threonine kinase 39                                               | miR-26a                         |
| <i>STMN1</i>   | stathmin 1                                                               | miR-26a                         |
| <i>STOML1</i>  | stomatin (EPB72)-like 1                                                  | mir-484                         |
| <i>STOX2</i>   | storkhead box 2                                                          | miR-26a                         |
| <i>STRA6</i>   | stimulated by retinoic acid 6                                            | mir-484                         |
| <i>STRADB</i>  | STE20-related kinase adaptor beta                                        | miR-26a                         |
| <i>STRBP</i>   | spermatid perinuclear RNA binding protein                                | miR-26a                         |
| <i>STT3B</i>   | STT3B, subunit of the oligosaccharyltransferase complex (catalytic)      | miR-26a                         |
| <i>STX17</i>   | syntaxin 17                                                              | mir-484                         |
| <i>STX1B</i>   | syntaxin 1B                                                              | miR-222                         |
| <i>STX7</i>    | syntaxin 7                                                               | miR-26a                         |
| <i>STYX</i>    | serine/threonine/tyrosine interacting protein                            | miR-26a;<br>miR-222;<br>miR-484 |
| <i>SULF1</i>   | sulfatase 1                                                              | miR-26a                         |
| <i>SULT4A1</i> | sulfotransferase family 4A, member 1                                     | mir-484                         |
| <i>SUN2</i>    | Sad1 and UNC84 domain containing 2                                       | miR-222                         |

|                 |                                                                                          |                     |
|-----------------|------------------------------------------------------------------------------------------|---------------------|
| <i>SUSD1</i>    | sushi domain containing 1                                                                | mir-484             |
| <i>SUV420H2</i> | suppressor of variegation 4-20 homolog 2 (Drosophila)                                    | miR-26a             |
| <i>SYNCRIP</i>  | synaptotagmin binding, cytoplasmic RNA interacting protein                               | miR-26a             |
| <i>SYNPO</i>    | synaptopodin                                                                             | mir-484             |
| <i>SYT1</i>     | synaptotagmin I                                                                          | mir-484             |
| <i>SYT10</i>    | synaptotagmin X                                                                          | miR-26a             |
| <i>SYT15</i>    | synaptotagmin XV                                                                         | mir-484             |
| <i>TAB2</i>     | TGF-beta activated kinase 1/MAP3K7 binding protein 2                                     | miR-26a             |
| <i>TAB3</i>     | TGF-beta activated kinase 1/MAP3K7 binding protein 3                                     | miR-26a             |
| <i>TAF9B</i>    | TAF9B RNA polymerase II, TATA box binding protein (TBP)-associated factor, 31kDa         | miR-26a             |
| <i>TANC2</i>    | tetratricopeptide repeat, ankyrin repeat and coiled-coil containing 2                    | miR-26a             |
| <i>TAOK1</i>    | TAO kinase 1                                                                             | miR-26a;<br>miR-222 |
| <i>TARBP2</i>   | TAR (HIV-1) RNA binding protein 2                                                        | mir-484             |
| <i>TBC1D25</i>  | TBC1 domain family, member 25                                                            | mir-484             |
| <i>TBC1D30</i>  | TBC1 domain family, member 30                                                            | miR-26a             |
| <i>TBC1D4</i>   | TBC1 domain family, member 4                                                             | miR-26a             |
| <i>TBX15</i>    | T-box 15                                                                                 | miR-222             |
| <i>TCEA1</i>    | transcription elongation factor A (SII), 1                                               | mir-484             |
| <i>TCEANC2</i>  | transcription elongation factor A (SII) N-terminal and central domain containing 2       | mir-484             |
| <i>TCF12</i>    | transcription factor 12                                                                  | miR-26a;<br>miR-222 |
| <i>TCF21</i>    | transcription factor 21                                                                  | mir-484             |
| <i>TCF4</i>     | transcription factor 4                                                                   | miR-26a;<br>miR-222 |
| <i>TCF7</i>     | transcription factor 7 (T-cell specific, HMG-box)                                        | mir-484             |
| <i>TCF7L2</i>   | transcription factor 7-like 2 (T-cell specific, HMG-box)                                 | miR-26a;<br>miR-222 |
| <i>TCIRG1</i>   | T-cell, immune regulator 1, ATPase, H <sup>+</sup> transporting, lysosomal V0 subunit A3 | mir-484             |
| <i>TDRD10</i>   | tudor domain containing 10                                                               | mir-484             |
| <i>TECPR1</i>   | tectonin beta-propeller repeat containing 1                                              | mir-484             |
| <i>TERF2</i>    | telomeric repeat binding factor 2                                                        | miR-222             |
| <i>TESK2</i>    | testis-specific kinase 2                                                                 | miR-26a             |
| <i>TET1</i>     | tet methylcytosine dioxygenase 1                                                         | miR-26a             |
| <i>TET2</i>     | tet methylcytosine dioxygenase 2                                                         | miR-26a             |
| <i>TET3</i>     | tet methylcytosine dioxygenase 3                                                         | miR-26a             |
| <i>TEX261</i>   | testis expressed 261                                                                     | mir-484             |
| <i>TFAP2A</i>   | transcription factor AP-2 alpha (activating enhancer binding protein 2 alpha)            | miR-26a             |
| <i>TFAP2C</i>   | transcription factor AP-2 gamma (activating enhancer binding protein 2 gamma)            | miR-26a             |

|                       |                                                                                   |                     |
|-----------------------|-----------------------------------------------------------------------------------|---------------------|
| <i>TFAP2E</i>         | transcription factor AP-2 epsilon (activating enhancer binding protein 2 epsilon) | miR-26a             |
| <i>TGFA</i>           | transforming growth factor, alpha                                                 | mir-484             |
| <i>TGFB1</i>          | transforming growth factor, beta 1                                                | mir-484             |
| <i>TGFB2</i>          | transforming growth factor, beta 2                                                | mir-484             |
| <i>TGIF2-C20orf24</i> | TGIF2-C20orf24 readthrough                                                        | miR-26a             |
| <i>THAP2</i>          | THAP domain containing, apoptosis associated protein 2                            | miR-26a             |
| <i>THAP4</i>          | THAP domain containing 4                                                          | mir-484             |
| <i>THBD</i>           | thrombomodulin                                                                    | mir-484             |
| <i>THRAP3</i>         | thyroid hormone receptor associated protein 3                                     | miR-26a             |
| <i>TIFAB</i>          | TRAF-interacting protein with forkhead-associated domain, family member B         | mir-484             |
| <i>TIMP2</i>          | TIMP metalloproteinase inhibitor 2                                                | mir-484             |
| <i>TIMP3</i>          | TIMP metalloproteinase inhibitor 3                                                | miR-222             |
| <i>TIPARP</i>         | TCDD-inducible poly(ADP-ribose) polymerase                                        | miR-222             |
| <i>TIRAP</i>          | toll-interleukin 1 receptor (TIR) domain containing adaptor protein               | mir-484             |
| <i>TLE3</i>           | transducin-like enhancer of split 3 (E(sp1) homolog, Drosophila)                  | miR-222             |
| <i>TLK1</i>           | tousled-like kinase 1                                                             | miR-222             |
| <i>TLR3</i>           | toll-like receptor 3                                                              | miR-26a             |
| <i>TLX1</i>           | T-cell leukemia homeobox 1                                                        | mir-484             |
| <i>TM7SF2</i>         | transmembrane 7 superfamily member 2                                              | mir-484             |
| <i>TMC7</i>           | transmembrane channel-like 7                                                      | miR-26a             |
| <i>TMCC1</i>          | transmembrane and coiled-coil domain family 1                                     | miR-26a;<br>miR-222 |
| <i>TMCO4</i>          | transmembrane and coiled-coil domains 4                                           | mir-484             |
| <i>TMED10</i>         | transmembrane emp24-like trafficking protein 10 (yeast)                           | miR-26a             |
| <i>TMEM117</i>        | transmembrane protein 117                                                         | mir-484             |
| <i>TMEM135</i>        | transmembrane protein 135                                                         | miR-26a             |
| <i>TMEM178B</i>       | transmembrane protein 178B                                                        | miR-26a             |
| <i>TMEM180</i>        | transmembrane protein 180                                                         | mir-484             |
| <i>TMEM184B</i>       | transmembrane protein 184B                                                        | miR-26a             |
| <i>TMEM189</i>        | transmembrane protein 189                                                         | mir-484             |
| <i>TMEM2</i>          | transmembrane protein 2                                                           | miR-26a             |
| <i>TMEM200B</i>       | transmembrane protein 200B                                                        | miR-26a             |
| <i>TMEM208</i>        | transmembrane protein 208                                                         | mir-484             |
| <i>TMEM239</i>        | transmembrane protein 239                                                         | mir-484             |
| <i>TMEM242</i>        | transmembrane protein 242                                                         | mir-484             |
| <i>TMEM251</i>        | transmembrane protein 251                                                         | miR-26a             |
| <i>TMEM260</i>        | transmembrane protein 260                                                         | miR-26a             |
| <i>TMEM33</i>         | transmembrane protein 33                                                          | miR-26a             |
| <i>TMEM43</i>         | transmembrane protein 43                                                          | mir-484             |
| <i>TMEM52</i>         | transmembrane protein 52                                                          | mir-484             |
| <i>TMEM56</i>         | transmembrane protein 56                                                          | miR-26a             |

|                 |                                                                                       |                                 |
|-----------------|---------------------------------------------------------------------------------------|---------------------------------|
| <i>TMEM63C</i>  | transmembrane protein 63C                                                             | mir-484                         |
| <i>TMEM64</i>   | transmembrane protein 64                                                              | miR-26a                         |
| <i>TMEM68</i>   | transmembrane protein 68                                                              | miR-26a                         |
| <i>TMOD3</i>    | tropomodulin 3 (ubiquitous)                                                           | mir-484                         |
| <i>TMOD4</i>    | tropomodulin 4 (muscle)                                                               | mir-484                         |
| <i>TMTC1</i>    | transmembrane and tetratricopeptide repeat containing 1                               | mir-484                         |
| <i>TMTC3</i>    | transmembrane and tetratricopeptide repeat containing 3                               | miR-26a                         |
| <i>TNFAIP8</i>  | tumor necrosis factor, alpha-induced protein 8                                        | mir-484                         |
| <i>TNKS2</i>    | tankyrase, TRF1-interacting ankyrin-related ADP-ribose polymerase 2                   | miR-26a                         |
| <i>TNPO1</i>    | transportin 1                                                                         | miR-26a                         |
| <i>TNRC6A</i>   | trinucleotide repeat containing 6A                                                    | miR-26a                         |
| <i>TNRC6B</i>   | trinucleotide repeat containing 6B                                                    | miR-26a                         |
| <i>TNRC6C</i>   | trinucleotide repeat containing 6C                                                    | miR-26a;<br>miR-222             |
| <i>TOB1</i>     | transducer of ERBB2, 1                                                                | miR-26a                         |
| <i>TOR1AIP1</i> | torsin A interacting protein 1                                                        | miR-222                         |
| <i>TOX</i>      | thymocyte selection-associated high mobility group box                                | miR-222                         |
| <i>TP53AIP1</i> | tumor protein p53 regulated apoptosis inducing protein 1                              | mir-484                         |
| <i>TP53BP2</i>  | tumor protein p53 binding protein, 2                                                  | miR-222                         |
| <i>TP53INP1</i> | tumor protein p53 inducible nuclear protein 1                                         | miR-26a                         |
| <i>TP53INP2</i> | tumor protein p53 inducible nuclear protein 2                                         | miR-26a;<br>miR-222;<br>miR-484 |
| <i>TPD52</i>    | tumor protein D52                                                                     | miR-26a                         |
| <i>TPP2</i>     | tripeptidyl peptidase II                                                              | mir-484                         |
| <i>TPPP</i>     | tubulin polymerization promoting protein                                              | miR-26a                         |
| <i>TRABD2B</i>  | TraB domain containing 2B                                                             | miR-222                         |
| <i>TRAPPC2L</i> | trafficking protein particle complex 2-like                                           | mir-484                         |
| <i>TRAPPC3</i>  | trafficking protein particle complex 3                                                | mir-484                         |
| <i>TRERF1</i>   | transcriptional regulating factor 1                                                   | miR-26a                         |
| <i>TRIB1</i>    | tribbles pseudokinase 1                                                               | mir-484                         |
| <i>TRIB2</i>    | tribbles pseudokinase 2                                                               | miR-26a;<br>miR-222             |
| <i>TRIM46</i>   | tripartite motif containing 46                                                        | mir-484                         |
| <i>TRIM71</i>   | tripartite motif containing 71, E3 ubiquitin protein ligase                           | miR-26a                         |
| <i>TRPC3</i>    | transient receptor potential cation channel, subfamily C, member 3                    | miR-26a;<br>miR-222             |
| <i>TRPC4AP</i>  | transient receptor potential cation channel, subfamily C, member 4 associated protein | mir-484                         |
| <i>TRPC6</i>    | transient receptor potential cation channel, subfamily C, member 6                    | miR-26a                         |
| <i>TRPM3</i>    | transient receptor potential cation channel, subfamily M, member 3                    | miR-222                         |



|                |                                                                    |                                 |
|----------------|--------------------------------------------------------------------|---------------------------------|
| <i>TRPM6</i>   | transient receptor potential cation channel, subfamily M, member 6 | miR-26a                         |
| <i>TRPS1</i>   | trichorhinophalangeal syndrome I                                   | miR-26a;<br>miR-222             |
| <i>TRPV1</i>   | transient receptor potential cation channel, subfamily V, member 1 | mir-484                         |
| <i>TSC22D2</i> | TSC22 domain family, member 2                                      | miR-26a                         |
| <i>TSC22D3</i> | TSC22 domain family, member 3                                      | miR-222                         |
| <i>TSC22D4</i> | TSC22 domain family, member 4                                      | miR-26a                         |
| <i>TSNARE1</i> | t-SNARE domain containing 1                                        | mir-484                         |
| <i>TSPAN14</i> | tetraspanin 14                                                     | miR-26a                         |
| <i>TSPAN3</i>  | tetraspanin 3                                                      | mir-484                         |
| <i>TSPYL4</i>  | TSPY-like 4                                                        | miR-26a;<br>miR-484             |
| <i>TTC13</i>   | tetratricopeptide repeat domain 13                                 | miR-26a                         |
| <i>TTC28</i>   | tetratricopeptide repeat domain 28                                 | miR-26a                         |
| <i>TTC9C</i>   | tetratricopeptide repeat domain 9C                                 | miR-26a                         |
| <i>TTPAL</i>   | tocopherol (alpha) transfer protein-like                           | miR-26a                         |
| <i>TUB</i>     | tubby bipartite transcription factor                               | miR-26a                         |
| <i>TUBD1</i>   | tubulin, delta 1                                                   | miR-26a                         |
| <i>TUFT1</i>   | tuftelin 1                                                         | mir-484                         |
| <i>TWF1</i>    | twinfilin actin-binding protein 1                                  | miR-26a;<br>miR-484             |
| <i>TXNDC15</i> | thioredoxin domain containing 15                                   | miR-26a                         |
| <i>UBAC1</i>   | UBA domain containing 1                                            | miR-26a                         |
| <i>UBAP2L</i>  | ubiquitin associated protein 2-like                                | mir-484                         |
| <i>UBE2D1</i>  | ubiquitin-conjugating enzyme E2D 1                                 | miR-26a                         |
| <i>UBE2D4</i>  | ubiquitin-conjugating enzyme E2D 4 (putative)                      | mir-484                         |
| <i>UBE2E2</i>  | ubiquitin-conjugating enzyme E2E 2                                 | miR-26a                         |
| <i>UBE2G1</i>  | ubiquitin-conjugating enzyme E2G 1                                 | miR-26a;<br>miR-222             |
| <i>UBE2H</i>   | ubiquitin-conjugating enzyme E2H                                   | miR-26a                         |
| <i>UBE2J1</i>  | ubiquitin-conjugating enzyme E2, J1                                | miR-26a;<br>miR-222             |
| <i>UBE2QL1</i> | ubiquitin-conjugating enzyme E2Q family-like 1                     | miR-26a                         |
| <i>UBE2R2</i>  | ubiquitin-conjugating enzyme E2R 2                                 | mir-484                         |
| <i>UBE2V1</i>  | ubiquitin-conjugating enzyme E2 variant 1                          | mir-484                         |
| <i>UBE2W</i>   | ubiquitin-conjugating enzyme E2W (putative)                        | miR-26a                         |
| <i>UBE3A</i>   | ubiquitin protein ligase E3A                                       | miR-26a                         |
| <i>UBE4B</i>   | ubiquitination factor E4B                                          | miR-26a                         |
| <i>UBN2</i>    | ubinuclein 2                                                       | miR-26a;<br>miR-222;<br>miR-484 |
| <i>UBQLN4</i>  | ubiquilin 4                                                        | mir-484                         |
| <i>UBR3</i>    | ubiquitin protein ligase E3 component n-recogin 3 (putative)       | miR-26a                         |
| <i>UBTD2</i>   | ubiquitin domain containing 2                                      | miR-26a                         |
| <i>UBXN7</i>   | UBX domain protein 7                                               | mir-484                         |

|               |                                                                        |         |
|---------------|------------------------------------------------------------------------|---------|
| <i>UCK2</i>   | uridine-cytidine kinase 2                                              | miR-26a |
| <i>UGT8</i>   | UDP glycosyltransferase 8                                              | miR-26a |
| <i>ULK1</i>   | unc-51 like autophagy activating kinase 1                              | miR-26a |
| <i>ULK2</i>   | unc-51 like autophagy activating kinase 2                              | miR-26a |
| <i>UNC45A</i> | unc-45 homolog A (C. elegans)                                          | mir-484 |
| <i>URI1</i>   | URI1, prefoldin-like chaperone                                         | miR-222 |
| <i>USP15</i>  | ubiquitin specific peptidase 15                                        | miR-26a |
| <i>USP2</i>   | ubiquitin specific peptidase 2                                         | mir-484 |
| <i>USP24</i>  | ubiquitin specific peptidase 24                                        | mir-484 |
| <i>USP25</i>  | ubiquitin specific peptidase 25                                        | miR-26a |
| <i>USP27X</i> | ubiquitin specific peptidase 27, X-linked                              | miR-26a |
| <i>USP3</i>   | ubiquitin specific peptidase 3                                         | miR-26a |
| <i>USP37</i>  | ubiquitin specific peptidase 37                                        | miR-26a |
| <i>USP53</i>  | ubiquitin specific peptidase 53                                        | miR-26a |
| <i>USP9X</i>  | ubiquitin specific peptidase 9, X-linked                               | miR-26a |
| <i>USP9Y</i>  | ubiquitin specific peptidase 9, Y-linked                               | miR-26a |
| <i>UST</i>    | uronyl-2-sulfotransferase                                              | mir-484 |
| <i>UTY</i>    | ubiquitously transcribed tetratricopeptide repeat containing, Y-linked | miR-26a |
| <i>VAC14</i>  | Vac14 homolog (S. cerevisiae)                                          | mir-484 |
| <i>VAMP1</i>  | vesicle-associated membrane protein 1 (synaptobrevin 1)                | miR-26a |
| <i>VAMP2</i>  | vesicle-associated membrane protein 2 (synaptobrevin 2)                | mir-484 |
| <i>VANGL2</i> | VANGL planar cell polarity protein 2                                   | miR-26a |
| <i>VAPB</i>   | VAMP (vesicle-associated membrane protein)-associated protein B and C  | miR-222 |
| <i>VASH1</i>  | vasohibin 1                                                            | miR-222 |
| <i>VASH2</i>  | vasohibin 2                                                            | mir-484 |
| <i>VAV3</i>   | vav 3 guanine nucleotide exchange factor                               | mir-484 |
| <i>VDAC1</i>  | voltage-dependent anion channel 1                                      | miR-26a |
| <i>VEZF1</i>  | vascular endothelial zinc finger 1                                     | miR-222 |
| <i>VGLL4</i>  | vestigial like 4 (Drosophila)                                          | miR-222 |
| <i>VLDLR</i>  | very low density lipoprotein receptor                                  | miR-26a |
| <i>VMP1</i>   | vacuole membrane protein 1                                             | miR-26a |
| <i>VPS37D</i> | vacuolar protein sorting 37 homolog D (S. cerevisiae)                  | mir-484 |
| <i>VSIG10</i> | V-set and immunoglobulin domain containing 10                          | miR-26a |
| <i>VTI1A</i>  | vesicle transport through interaction with t-SNAREs 1A                 | mir-484 |
| <i>VTI1B</i>  | vesicle transport through interaction with t-SNAREs 1B                 | miR-26a |
| <i>WAPAL</i>  | wings apart-like homolog (Drosophila)                                  | miR-26a |
| <i>WASF2</i>  | WAS protein family, member 2                                           | miR-222 |
| <i>WDFY2</i>  | WD repeat and FYVE domain containing 2                                 | mir-484 |
| <i>WDFY4</i>  | WDFY family member 4                                                   | mir-484 |
| <i>WDR31</i>  | WD repeat domain 31                                                    | mir-484 |
| <i>WDR47</i>  | WD repeat domain 47                                                    | miR-222 |

|                |                                                                                             |                     |
|----------------|---------------------------------------------------------------------------------------------|---------------------|
| <i>WDR6</i>    | WD repeat domain 6                                                                          | mir-484             |
| <i>WDR72</i>   | WD repeat domain 72                                                                         | mir-484             |
| <i>WHSC1</i>   | Wolf-Hirschhorn syndrome candidate 1                                                        | miR-26a             |
| <i>WIPF2</i>   | WAS/WASL interacting protein family, member 2                                               | miR-26a             |
| <i>WLS</i>     | wntless Wnt ligand secretion mediator                                                       | miR-222             |
| <i>WNK1</i>    | WNK lysine deficient protein kinase 1                                                       | miR-26a             |
| <i>WNK3</i>    | WNK lysine deficient protein kinase 3                                                       | miR-26a;<br>miR-222 |
| <i>WNT4</i>    | wingless-type MMTV integration site family, member 4                                        | mir-484             |
| <i>WNT5A</i>   | wingless-type MMTV integration site family, member 5A                                       | miR-26a             |
| <i>WNT9A</i>   | wingless-type MMTV integration site family, member 9A                                       | mir-484             |
| <i>WNT9B</i>   | wingless-type MMTV integration site family, member 9B                                       | mir-484             |
| <i>XKR4</i>    | XK, Kell blood group complex subunit-related family, member 4                               | miR-26a;<br>miR-222 |
| <i>XPO7</i>    | exportin 7                                                                                  | mir-484             |
| <i>YAP1</i>    | Yes-associated protein 1                                                                    | mir-484             |
| <i>YDJC</i>    | YdjC homolog (bacterial)                                                                    | mir-484             |
| <i>YIPF4</i>   | Yip1 domain family, member 4                                                                | miR-26a             |
| <i>YPEL1</i>   | yippee-like 1 ( <i>Drosophila</i> )                                                         | miR-26a             |
| <i>YTHDC1</i>  | YTH domain containing 1                                                                     | miR-222             |
| <i>YTHDF3</i>  | YTH domain family, member 3                                                                 | miR-26a             |
| <i>YWHAЕ</i>   | tyrosine 3-monooxygenase/tryptophan 5-monooxygenase activation protein, epsilon polypeptide | miR-26a             |
| <i>YWHAG</i>   | tyrosine 3-monooxygenase/tryptophan 5-monooxygenase activation protein, gamma polypeptide   | miR-222             |
| <i>ZADH2</i>   | zinc binding alcohol dehydrogenase domain containing 2                                      | miR-222             |
| <i>ZBTB10</i>  | zinc finger and BTB domain containing 10                                                    | miR-26a             |
| <i>ZBTB16</i>  | zinc finger and BTB domain containing 16                                                    | miR-26a             |
| <i>ZBTB18</i>  | zinc finger and BTB domain containing 18                                                    | miR-26a             |
| <i>ZBTB20</i>  | zinc finger and BTB domain containing 20                                                    | miR-26a             |
| <i>ZBTB37</i>  | zinc finger and BTB domain containing 37                                                    | miR-26a;<br>miR-222 |
| <i>ZBTB38</i>  | zinc finger and BTB domain containing 38                                                    | miR-26a;<br>miR-484 |
| <i>ZBTB42</i>  | zinc finger and BTB domain containing 42                                                    | mir-484             |
| <i>ZBTB7C</i>  | zinc finger and BTB domain containing 7C                                                    | miR-26a             |
| <i>ZC3H7B</i>  | zinc finger CCCH-type containing 7B                                                         | miR-26a             |
| <i>ZCCHC11</i> | zinc finger, CCHC domain containing 11                                                      | miR-26a             |
| <i>ZCCHC14</i> | zinc finger, CCHC domain containing 14                                                      | mir-484             |
| <i>ZCCHC17</i> | zinc finger, CCHC domain containing 17                                                      | mir-484             |
| <i>ZCCHC2</i>  | zinc finger, CCHC domain containing 2                                                       | miR-26a             |
| <i>ZCCHC24</i> | zinc finger, CCHC domain containing 24                                                      | miR-26a             |
| <i>ZDHHC17</i> | zinc finger, DHHC-type containing 17                                                        | miR-222             |

|                |                                          |                     |
|----------------|------------------------------------------|---------------------|
| <i>ZDHHC18</i> | zinc finger, DHHC-type containing 18     | miR-26a;<br>miR-484 |
| <i>ZDHHC20</i> | zinc finger, DHHC-type containing 20     | miR-26a             |
| <i>ZDHHC23</i> | zinc finger, DHHC-type containing 23     | mir-484             |
| <i>ZDHHC3</i>  | zinc finger, DHHC-type containing 3      | mir-484             |
| <i>ZDHHC6</i>  | zinc finger, DHHC-type containing 6      | miR-26a             |
| <i>ZDHHC7</i>  | zinc finger, DHHC-type containing 7      | miR-26a             |
| <i>ZDHHC8</i>  | zinc finger, DHHC-type containing 8      | mir-484             |
| <i>ZDHHC9</i>  | zinc finger, DHHC-type containing 9      | mir-484             |
| <i>ZEB2</i>    | zinc finger E-box binding homeobox 2     | miR-26a;<br>miR-222 |
| <i>ZFAND2B</i> | zinc finger, AN1-type domain 2B          | mir-484             |
| <i>ZFAND5</i>  | zinc finger, AN1-type domain 5           | miR-222             |
| <i>ZFC3H1</i>  | zinc finger, C3H1-type containing        | miR-26a             |
| <i>ZFHX2</i>   | zinc finger homeobox 2                   | mir-484             |
| <i>ZFHX3</i>   | zinc finger homeobox 3                   | miR-26a;<br>miR-222 |
| <i>ZFHX4</i>   | zinc finger homeobox 4                   | miR-26a             |
| <i>ZFP36</i>   | ZFP36 ring finger protein                | miR-222             |
| <i>ZFP36L2</i> | ZFP36 ring finger protein-like 2         | miR-222             |
| <i>ZFPM2</i>   | zinc finger protein, FOG family member 2 | miR-222             |
| <i>ZFX</i>     | zinc finger protein, X-linked            | miR-26a             |
| <i>ZFY</i>     | zinc finger protein, Y-linked            | miR-26a             |
| <i>ZFYVE1</i>  | zinc finger, FYVE domain containing 1    | mir-484             |
| <i>ZIC4</i>    | Zic family member 4                      | mir-484             |
| <i>ZIC5</i>    | Zic family member 5                      | miR-26a             |
| <i>ZKSCAN1</i> | zinc finger with KRAB and SCAN domains 1 | miR-26a             |
| <i>ZMAT5</i>   | zinc finger, matrin-type 5               | mir-484             |
| <i>ZMIZ2</i>   | zinc finger, MIZ-type containing 2       | mir-484             |
| <i>ZMYM2</i>   | zinc finger, MYM-type 2                  | miR-222             |
| <i>ZNF148</i>  | zinc finger protein 148                  | miR-26a             |
| <i>ZNF217</i>  | zinc finger protein 217                  | miR-26a             |
| <i>ZNF275</i>  | zinc finger protein 275                  | miR-26a             |
| <i>ZNF385A</i> | zinc finger protein 385A                 | miR-222             |
| <i>ZNF385B</i> | zinc finger protein 385B                 | miR-26a             |
| <i>ZNF410</i>  | zinc finger protein 410                  | miR-26a             |
| <i>ZNF462</i>  | zinc finger protein 462                  | miR-26a             |
| <i>ZNF469</i>  | zinc finger protein 469                  | miR-26a             |
| <i>ZNF503</i>  | zinc finger protein 503                  | mir-484             |
| <i>ZNF516</i>  | zinc finger protein 516                  | miR-26a             |
| <i>ZNF518B</i> | zinc finger protein 518B                 | miR-222             |
| <i>ZNF574</i>  | zinc finger protein 574                  | mir-484             |
| <i>ZNF598</i>  | zinc finger protein 598                  | miR-26a             |
| <i>ZNF608</i>  | zinc finger protein 608                  | miR-26a             |
| <i>ZNF618</i>  | zinc finger protein 618                  | miR-222             |
| <i>ZNF629</i>  | zinc finger protein 629                  | miR-222;<br>miR-484 |

|               |                                     |                     |
|---------------|-------------------------------------|---------------------|
| <i>ZNF641</i> | zinc finger protein 641             | mir-484             |
| <i>ZNF652</i> | zinc finger protein 652             | miR-26a;<br>miR-222 |
| <i>ZNF697</i> | zinc finger protein 697             | miR-26a             |
| <i>ZNF783</i> | zinc finger family member 783       | mir-484             |
| <i>ZNF784</i> | zinc finger protein 784             | mir-484             |
| <i>ZNF786</i> | zinc finger protein 786             | mir-484             |
| <i>ZNRF3</i>  | zinc and ring finger 3              | miR-26a             |
| <i>ZSWIM6</i> | zinc finger, SWIM-type containing 6 | miR-26a             |
